# Supplementary material for: Fitness Landscape of Antibiotic Tolerance in Pseudomonas aeruginosa Biofilms
Source: PLoS Pathog. 2011 Oct 20;7(10):e1002298. doi: 10.1371/journal.ppat.1002298 (PMC3197603; doi:10.1371/journal.ppat.1002298)
Supplement: Dataset S3 — Clusters of genes whose modulation or disruption by transposons differentially altered fitness among different experimental conditions. (XLS) [file ppat.1002298.s003.xls]

## Sheet: Dataset S3
Dataset S3: Clusters of genes whose disruption causes differentially altered fitness among the biofilm/planktonic, tobramycin/no-drug competitions
Shown are the mean-centered and normalized hybridization scores for the 586 genes with the largest differential and beneficial behavior (see Supplementary Information).
PANUM	Annotation	Cluster	Biofilm_ND1	Biofilm_ND2	Biofilm_TOB1	Biofilm_TOB2	Planktonic TOB1	Planktonic TOB2	Planktonic_ND1	Planktonic_ND2
PA0012	PA0012 hypothetical protein	TOB (Biofilm and Planktonic)	-1.05228	-1.14129	0.154885	1.51505	0.740405	0.994394	-0.592796	-0.618371
PA0014	PA0014 hypothetical protein	Planktonic (TOB Only)	0.311938	1.11598	-0.645113	-0.915579	0.992047	1.16762	-1.03759	-0.989305
PA0015	PA0015 hypothetical protein	Biofilm (ND Only)	1.75338	1.18214	-0.831444	-0.976963	-0.72021	-0.578067	0.171953	-0.000793633
PA0018	PA0018 methionyl-tRNA formyltransferase	Biofilm (ND Only)	1.5224	1.55533	-0.587173	-1.07036	-0.368173	0.0609122	-0.640877	-0.472052
PA0043	PA0043 hypothetical protein	Biofilm (ND Only)	0.983444	1.94073	-0.736868	-1.09261	0.108847	-0.327626	-0.322136	-0.553778
PA0044	PA0044 exoenzyme T	Biofilm (TOB Only)	-1.40173	-1.40537	1.33168	0.674493	0.900104	0.0763768	-0.10048	-0.0750713
PA0047	PA0047 hypothetical protein	Biofilm (ND Only)	1.53278	1.53971	-1.07843	-0.763653	-0.371273	-0.598058	-0.0852835	-0.175795
PA0078	PA0078 hypothetical protein	Biofilm (TOB Only)	-1.11029	-1.17913	1.66409	1.10802	0.358327	-0.378168	-0.20424	-0.258612
PA0081	PA0081 hypothetical protein	Biofilm (ND Only)	1.51607	1.62752	-0.493758	-0.878475	-0.62427	-0.751952	-0.242379	-0.152746
PA0106	PA0106 cytochrome c oxidase, subunit I	TOB (Biofilm and Planktonic)	-1.15286	-1.27252	1.02977	-0.202851	0.913861	1.36851	-0.277989	-0.405928
PA0109	PA0109 hypothetical protein	Planktonic (ND Only)	-0.897106	-0.881538	0.244542	0.53276	-0.781063	-0.870658	1.6323	1.02077
PA0144	PA0144 hypothetical protein	Biofilm (TOB Only)	-0.7922	-0.687087	0.75805	2.16902	-0.101764	-0.406663	-0.424295	-0.515061
PA0159	PA0159 probable transcriptional regulator	Biofilm (TOB Only)	-0.907858	-0.893631	1.44644	1.62914	-0.451274	-0.640275	-0.072814	-0.109724
PA0160	PA0160 hypothetical protein	Planktonic (ND Only)	0.0487161	-0.584871	-0.967233	-1.17626	0.234072	-0.334378	1.78098	0.998966
PA0163	PA0163 probable transcriptional regulator	Planktonic (TOB Only)	-0.53171	-1.17911	-0.664102	0.32162	1.57904	1.37287	-0.431707	-0.466901
PA0190	PA0190 probable acid phosphatase	Biofilm (ND Only)	1.49043	1.69598	-0.587957	-0.742317	-0.277742	-0.271142	-0.667719	-0.63954
PA0206	PA0206 probable ATP-binding component of ABC transporter	TOB (Biofilm and Planktonic)	-1.08084	-1.11077	0.350783	0.652631	1.35916	1.15185	-0.659172	-0.663644
PA0207	PA0207 probable transcriptional regulator	Planktonic (TOB Only)	-0.777748	-0.820544	-0.191554	-0.701099	1.76223	1.37143	-0.301806	-0.340909
PA0226	PA0226 probable CoA transferase, subunit A	Biofilm (ND Only)	1.42817	1.6365	-0.811654	-1.06935	-0.604357	-0.165907	-0.235886	-0.177516
PA0233	PA0233 probable transcriptional regulator	Biofilm (ND Only)	1.83441	1.17458	-0.845635	-0.845635	-0.567891	0.156983	-0.270675	-0.636143
PA0247	PA0247 p-hydroxybenzoate hydroxylase	Biofilm (ND Only)	1.74417	1.42514	-0.579195	-0.0744901	-0.676195	-0.626752	-0.591327	-0.621357
PA0249	PA0249 probable acetyltransferase	Biofilm (TOB Only)	-0.896693	-0.903658	1.29231	1.76849	0.0501021	-0.503487	-0.399066	-0.407999
PA0267	PA0267 hypothetical protein	Planktonic (ND Only)	-0.22045	-0.572444	-0.389973	-0.587465	-0.751322	-0.667386	1.72029	1.46875
PA0274	PA0274 hypothetical protein	Biofilm (ND Only)	1.78057	1.18535	-0.681563	-0.799331	-0.812028	-0.790836	-0.0620823	0.179912
PA0284	PA0284 hypothetical protein	Planktonic (TOB Only)	-0.818608	-0.867929	-0.727077	-0.881392	1.45896	1.43397	0.253185	0.148898
PA0287	PA0287 3-guanidinopropionate transport protein	Biofilm (TOB Only)	-0.765522	-0.974966	1.559	1.29592	0.458422	-0.0633732	-0.761845	-0.747636
PA0297	PA0297 probable glutamine amidotransferase	Planktonic (TOB Only)	-0.578143	-0.691894	0.401217	-1.02438	2.02418	0.719038	-0.448571	-0.401448
PA0298	PA0298 probable glutamine synthetase	Biofilm (ND Only)	-0.109019	2.40089	-0.601192	-0.590358	-0.308787	0.109935	-0.442599	-0.458869
PA0305	PA0305 hypothetical protein	Biofilm (TOB Only)	-0.933378	-1.05074	1.20179	1.07448	0.3825	0.965994	-0.83818	-0.802466
PA0331	PA0331 threonine dehydratase, biosynthetic	Planktonic (TOB Only)	-0.895037	-0.832153	-0.795626	0.103863	1.32231	1.70948	-0.351034	-0.261811
PA0336	PA0336 Nudix hydrolase YgdP	TOB (Biofilm and Planktonic)	-0.898984	-0.971588	1.49529	-0.836276	1.04484	0.954119	-0.377127	-0.410278
PA0343	PA0343 hypothetical protein	Planktonic (ND Only)	-0.156162	-0.216859	-0.819732	-0.986669	-0.347906	-0.51875	1.87918	1.1669
PA0350	PA0350 dihydrofolate reductase	Biofilm (ND Only)	2.07704	0.758249	-0.95893	-0.95893	-0.389033	-0.062636	-0.169202	-0.296563
PA0362	PA0362 ferredoxin [4Fe-4S]	Biofilm (ND Only)	0.0377868	2.443	-0.447876	-0.452636	-0.392388	-0.37803	-0.409998	-0.399857
PA0376	PA0376 sigma factor RpoH	Planktonic (TOB Only)	-0.164619	-0.373895	0.736779	-1.06493	1.63485	0.978596	-0.863378	-0.883401
PA0386	PA0386 probable oxidase	Planktonic (ND Only)	0.212741	-0.479346	-1.36224	0.618037	-0.772568	-0.777912	1.33166	1.22963
PA0390	PA0390 homoserine O-acetyltransferase	Planktonic (TOB Only)	-0.947894	-0.933731	0.887171	-0.261803	1.28996	1.33256	-0.661358	-0.704913
PA0393	PA0393 pyrroline-5-carboxylate reductase	Biofilm (ND Only)	1.55764	1.47981	-0.702936	-1.08174	-0.0357818	-0.0189509	-0.61244	-0.5856
PA0394	PA0394 conserved hypothetical protein	Biofilm (ND Only)	1.70829	1.50041	-0.611343	-0.79652	-0.468792	-0.518132	-0.369091	-0.444824
PA0395	PA0395 twitching motility protein PilT	Biofilm (ND Only)	1.72379	1.49608	-0.65523	-0.566977	-0.588482	-0.613405	-0.385812	-0.409964
PA0398	PA0398 hypothetical protein	Biofilm (TOB Only)	-0.946287	-0.956922	1.08035	1.41534	-0.915216	-0.736856	0.725437	0.334152
PA0403	PA0403 transcriptional regulator PyrR	Biofilm (ND Only)	0.830868	1.09287	-1.17152	-1.30733	0.495473	1.11105	-0.548903	-0.5025
PA0404	PA0404 conserved hypothetical protein	Biofilm (ND Only)	1.61821	1.30779	-1.0316	-1.12384	-0.0152106	0.0659893	-0.442377	-0.37895
PA0410	PA0410 twitching motility protein PilI	ND (Biofilm and Planktonic)	0.894335	1.67486	-0.865699	-0.859567	-0.843705	-0.867473	0.61571	0.25154
PA0412	PA0412 methyltransferase PilK	Biofilm (ND Only)	1.41976	1.73688	-0.645159	-0.758132	-0.706964	-0.511759	-0.456955	-0.0776691
PA0413	PA0413 component of chemotactic signal transduction system	ND (Biofilm and Planktonic)	1.5532	1.15462	-0.963483	-1.05913	-0.612191	-0.759437	0.436086	0.250328
PA0418	PA0418 hypothetical protein	TOB (Biofilm and Planktonic)	-0.926598	-1.10742	0.0789172	0.131231	1.96592	0.771883	-0.538548	-0.37538
PA0419	PA0419 conserved hypothetical protein	TOB (Biofilm and Planktonic)	-0.969729	-1.04271	1.08926	1.38362	0.610081	0.504506	-0.834363	-0.740669
PA0432	PA0432 S-adenosyl-L-homocysteine hydrolase	Biofilm (ND Only)	0.923753	1.9368	-0.90654	-1.13828	-0.4783	-0.180216	-0.031907	-0.125312
PA0444	PA0444 N-carbamoyl-beta-alanine amidohydrolase	ND (Biofilm and Planktonic)	0.480507	0.31333	-1.04144	-1.15332	-0.725943	-0.490426	1.48695	1.13034
PA0466	PA0466 hypothetical protein	Biofilm (TOB Only)	-0.859505	-0.981635	1.65971	1.27932	0.390314	-0.454233	-0.435912	-0.598054
PA0478	PA0478 probable N-acetyltransferase	Biofilm (ND Only)	1.08226	1.94637	-0.720493	-0.750691	-0.686766	-0.680337	-0.145606	-0.0447376
PA0486	PA0486 conserved hypothetical protein	TOB (Biofilm and Planktonic)	-1.07993	-1.05748	1.04331	0.540605	1.17098	0.90065	-0.75597	-0.762164
PA0510	PA0510 probable uroporphyrin-III c-methyltransferase	Biofilm (TOB Only)	-1.24893	-1.10718	1.18764	1.35232	0.784104	-0.15891	-0.342354	-0.466692
PA0511	PA0511 heme d1 biosynthesis protein NirJ	Biofilm (TOB Only)	-1.10356	-1.20854	1.38971	1.12238	0.289659	0.639514	-0.573716	-0.555455
PA0512	PA0512 conserved hypothetical protein	Planktonic (ND Only)	-0.135892	0.442472	-0.879842	-0.879842	-0.837539	-0.567118	1.68482	1.17294
PA0518	PA0518 cytochrome c-551 precursor	Planktonic (ND Only)	0.783488	-0.154563	-0.900443	-1.27534	-0.20154	-0.735575	1.60132	0.88265
PA0548	PA0548 transketolase	ND (Biofilm and Planktonic)	2.00888	0.11246	-0.94649	-1.22551	0.595544	0.0753399	-0.335949	-0.284275
PA0555	PA0555 fructose-1,6-bisphosphate aldolase	ND (Biofilm and Planktonic)	1.05774	0.427281	-1.19881	-1.19881	-0.618575	-0.539119	1.09826	0.972035
PA0572	PA0572 hypothetical protein	Biofilm (ND Only)	1.61267	1.51017	-0.4436	-0.754591	-0.765427	-0.846053	-0.126807	-0.186364
PA0575	PA0575 conserved hypothetical protein	Biofilm (TOB Only)	-0.611104	-0.638434	1.6534	1.41554	-0.834623	-0.867647	0.0536703	-0.170805
PA0577	PA0577 DNA primase	Biofilm (ND Only)	1.39005	1.74007	-0.821059	-0.821059	-0.583569	-0.311646	-0.494179	-0.098615
PA0600	PA0600 probable two-component sensor	Biofilm (TOB Only)	-0.239885	-0.775699	1.84138	1.20086	-0.809372	-0.873054	-0.0467407	-0.297494
PA0611	PA0611 transcriptional regulator PrtR	Biofilm (TOB Only)	-0.514986	-0.604438	1.58918	1.64476	-0.604933	-0.596853	-0.454515	-0.458213
PA0614	PA0614 hypothetical protein	TOB (Biofilm and Planktonic)	-0.792913	-0.817441	0.732604	-0.185365	0.96172	1.70785	-0.80109	-0.805364
PA0618	PA0618 probable bacteriophage protein	Planktonic (ND Only)	-1.00349	-0.983116	0.434391	-0.866168	-0.307678	-0.0744494	1.58177	1.21874
PA0620	PA0620 probable bacteriophage protein	TOB (Biofilm and Planktonic)	-1.04815	-1.20645	1.09136	0.365959	1.26952	0.817647	-0.578812	-0.711072
PA0624	PA0624 hypothetical protein	Planktonic (TOB Only)	-0.617554	-0.732593	-0.181644	-0.85694	1.76246	1.38533	-0.402811	-0.356253
PA0629	PA0629 conserved hypothetical protein	Biofilm (TOB Only)	-0.152754	-0.83811	1.64988	1.52023	-0.659929	-0.637841	-0.512235	-0.369232
PA0630	PA0630 hypothetical protein	Biofilm (TOB Only)	-0.535908	-0.564982	0.78415	2.19901	-0.413773	-0.67493	-0.423703	-0.369865
PA0643	PA0643 hypothetical protein	Planktonic (TOB Only)	-0.743422	-0.730374	0.0171915	-0.880963	1.51823	1.5874	-0.290097	-0.47797
PA0644	PA0644 hypothetical protein	Planktonic (TOB Only)	-0.741033	-0.95093	0.11715	-0.638608	1.61847	1.45983	-0.416734	-0.448147
PA0653	PA0653 conserved hypothetical protein	Biofilm (ND Only)	1.80632	1.35365	-0.769904	-0.769904	-0.445696	-0.588813	-0.328181	-0.25747
PA0677	PA0677 HxcW putative pseudopilin	Biofilm (ND Only)	1.70094	1.51946	-0.644946	-0.676548	-0.480366	-0.355223	-0.498917	-0.564393
PA0683	PA0683 probable type II secretion system protein	Planktonic (TOB Only)	0.166616	0.14114	-0.480405	-0.996357	1.90606	0.881963	-0.869702	-0.74932
PA0717	PA0717 hypothetical protein of bacteriophage Pf1	TOB (Biofilm and Planktonic)	-0.955531	-0.894473	0.161893	-0.789433	1.50354	1.44341	0.0679888	-0.537391
PA0733	PA0733 probable pseudouridylate synthase	Biofilm (TOB Only)	-0.845301	-0.950874	1.79408	1.08073	-0.646287	0.440078	-0.472843	-0.399585
PA0743	PA0743 probable 3-hydroxyisobutyrate dehydrogenase	Planktonic (TOB Only)	0.0382371	-0.34148	-0.125587	-1.05098	1.60454	1.41485	-0.776383	-0.763195
PA0746	PA0746 probable acyl-CoA dehydrogenase	Biofilm (TOB Only)	-0.391352	-0.501833	0.548256	2.29652	-0.615456	-0.591162	-0.458164	-0.286807
PA0748	PA0748 still frameshift probable transcriptional regulator	TOB (Biofilm and Planktonic)	-0.916929	-0.926795	0.901352	0.351442	0.976634	1.3683	-0.874098	-0.879907
PA0769	PA0769 hypothetical protein	Planktonic (TOB Only)	-0.798513	-0.836508	-0.385366	-0.796351	1.32392	1.75261	-0.0254566	-0.23433
PA0770	PA0770 ribonuclease III	Biofilm (ND Only)	1.01189	1.51792	-1.20785	-1.28353	0.604679	-0.0121349	-0.33521	-0.295763
PA0781	PA0781 hypothetical protein	Planktonic (TOB Only)	-0.820487	-0.495494	0.134857	-0.647964	1.49411	1.61062	-0.677616	-0.598023
PA0784	PA0784 probable transcriptional regulator	Planktonic (TOB Only)	-0.665161	-0.66876	-0.634005	-0.674527	1.49834	1.67817	-0.424338	-0.10972
PA0796	PA0796 carboxyphosphonoenolpyruvate phosphonomutase	ND (Biofilm and Planktonic)	0.82525	0.62259	-1.06943	-1.0876	-0.783796	-0.493817	0.371752	1.61505
PA0806	PA0806 hypothetical protein	Biofilm (ND Only)	1.02254	1.14936	-1.04542	-1.16042	0.67179	0.809051	-0.867099	-0.579815
PA0814	PA0814 conserved hypothetical protein	Biofilm (ND Only)	0.793881	1.97645	-0.88328	-0.936671	-0.651918	-0.545222	0.286404	-0.039644
PA0822	PA0822 hypothetical protein	Biofilm (ND Only)	1.29015	1.89318	-0.524213	-0.528173	-0.67276	-0.639476	-0.387635	-0.431072
PA0844	PA0844 hemolytic phospholipase C precursor	TOB (Biofilm and Planktonic)	-1.37647	-1.37185	1.052	0.645669	0.816677	0.88796	-0.450459	-0.203525
PA0848	PA0848 probable alkyl hydroperoxide reductase	Biofilm (TOB Only)	-0.514206	-0.569663	1.2134	1.91583	-0.780489	-0.607275	-0.136198	-0.521393
PA0878	PA0878 hypothetical protein	Biofilm (ND Only)	1.9299	1.25194	-0.588008	-0.581195	-0.587232	-0.434682	-0.493501	-0.497229
PA0880	PA0880 probable ring-cleaving dioxygenase	Planktonic (ND Only)	0.736519	0.114543	-1.16533	-1.16533	-0.371349	-0.65995	1.21891	1.29199
PA0896	PA0896 arginine/ornithine succinyltransferase AI subunit	Biofilm (TOB Only)	-0.944843	-0.914471	0.918457	1.91746	0.26073	-0.0783739	-0.529087	-0.629873
PA0901	PA0901 succinylglutamate desuccinylase	Biofilm (ND Only)	0.900199	1.87927	-1.02006	-1.08638	-0.653713	0.051903	-0.0839726	0.0127646
PA0905	PA0905 RsmA, regulator of secondary metabolites	Planktonic (ND Only)	-0.498085	-0.54308	-0.834049	-0.834049	-0.326486	0.0870954	0.924673	2.02398
PA0918	PA0918 cytochrome b561	Biofilm (TOB Only)	-0.629484	-0.323386	1.67853	1.53826	-0.625756	-0.683976	-0.456229	-0.49795
PA0927	PA0927 D-lactate dehydrogenase (fermentative)	Biofilm (ND Only)	1.5254	1.13268	-1.10004	-1.1388	-0.141172	0.622605	-0.263193	-0.637488
PA0945	PA0945 phosphoribosylaminoimidazole synthetase	Biofilm (ND Only)	2.01756	1.10638	-0.345754	-0.730466	-0.512977	-0.472121	-0.559713	-0.50291
PA1018	PA1018 hypothetical protein	Planktonic (TOB Only)	-0.785024	-0.782527	0.498878	-0.61133	1.39134	1.5528	-0.669117	-0.595021
PA1032	PA1032 QuiP	Planktonic (TOB Only)	-0.282004	-0.743708	-0.83384	-0.853101	1.89993	1.13271	-0.173378	-0.146602
PA1071	PA1071 branched-chain amino acid transport protein BraF	Biofilm (ND Only)	0.90213	2.11657	-0.772994	-0.652235	-0.294322	-0.296062	-0.556377	-0.446706
PA1081	PA1081 flagellar basal-body rod protein FlgF	Planktonic (ND Only)	-0.26485	-0.317653	-0.778546	-0.812695	-0.610219	-0.378932	1.7305	1.43239
PA1099	PA1099 two-component response regulator	Planktonic (TOB Only)	-0.662965	-0.729794	-0.823652	-0.863372	1.98372	0.78445	0.20578	0.105829
PA1102	PA1102 flagellar motor switch protein FliG	Planktonic (ND Only)	-0.152733	0.544523	-0.868102	-0.962263	-0.511078	-0.56987	2.04737	0.472148
PA1105	PA1105 flagellar protein FliJ	ND (Biofilm and Planktonic)	0.721876	0.300006	-0.924799	-1.22398	-0.778993	-0.558719	1.03307	1.43154
PA1114	PA1114 hypothetical protein	Biofilm (ND Only)	1.70186	1.19396	-0.782294	-1.17247	-0.480207	0.0171589	-0.655131	0.177116
PA1122	PA1122 probable peptide deformylase	Planktonic (ND Only)	-0.281021	-0.356796	-0.596745	-0.686489	-0.66751	-0.476411	0.986233	2.07874
PA1123	PA1123 hypothetical protein	Biofilm (ND Only)	1.82226	1.26892	-0.901323	-0.901323	-0.387496	-0.248693	-0.425273	-0.227078
PA1145	PA1145 probable transcriptional regulator	Biofilm (ND Only)	1.87075	1.29667	-0.22327	-0.659354	-0.659354	-0.567052	-0.62402	-0.434363
PA1148	PA1148 exotoxin A precursor	Biofilm (ND Only)	0.835268	2.12211	-0.644581	-0.673452	-0.704723	-0.595441	-0.272673	-0.0665067
PA1155	PA1155 NrdB, tyrosyl radical-harboring component of class Ia ribonucleotide reductase	Biofilm (ND Only)	2.1177	0.723772	-0.83965	-0.921056	-0.418219	0.0551912	-0.395079	-0.322658
PA1175	PA1175 NapD protein of periplasmic nitrate reductase	TOB (Biofilm and Planktonic)	-1.24988	-0.0484652	1.09075	0.00422883	1.22035	0.928921	-0.985229	-0.960676
PA1180	PA1180 two-component sensor PhoQ	Biofilm (ND Only)	2.03145	0.93829	-0.160064	-1.07393	-0.400155	-0.456078	-0.268044	-0.611471
PA1190	PA1190 conserved hypothetical protein	Biofilm (TOB Only)	-0.340745	-0.886985	1.56257	1.53423	-0.863022	-0.713602	-0.0970461	-0.195409
PA1203	PA1203 hypothetical protein	Biofilm (ND Only)	1.81444	0.748713	-1.09643	-1.16329	-0.339352	0.286665	-0.55144	0.300694
PA1228	PA1228 hypothetical protein	Biofilm (ND Only)	1.7254	0.944707	-1.07522	-1.16682	-0.559421	0.034326	-0.334969	0.432005
PA1232	PA1232 hypothetical protein	Biofilm (ND Only)	0.528216	2.30973	-0.508001	-0.61603	-0.490708	-0.385647	-0.483273	-0.354286
PA1238	PA1238 probable outer membrane component of multidrug efflux pump	Biofilm (ND Only)	1.73802	1.34995	-0.209382	-0.835058	-0.70693	-0.565682	-0.772019	0.00110274
PA1239	PA1239 hypothetical protein	Biofilm (ND Only)	1.09885	2.01779	-0.238276	-0.649915	-0.542798	-0.570423	-0.557357	-0.557873
PA1241	PA1241 probable transcriptional regulator	Planktonic (ND Only)	-0.616435	-0.523592	-0.553996	-0.993553	-0.535728	0.300946	1.01166	1.9107
PA1244	PA1244 hypothetical protein	ND (Biofilm and Planktonic)	1.0618	0.646636	-1.30625	-1.30625	-0.700265	0.0121968	0.419311	1.17283
PA1257	PA1257 probable permease of ABC transporter	Planktonic (TOB Only)	-0.612012	-0.407937	-0.425825	-0.637909	1.47634	1.74479	-0.569092	-0.568357
PA1258	PA1258 probable permease of ABC transporter	Planktonic (ND Only)	0.0561216	-0.413171	-0.810674	-0.810674	-0.611736	-0.511503	1.3694	1.73223
PA1266	PA1266 probable oxidoreductase	Planktonic (TOB Only)	-0.246033	-0.337567	-0.701412	-0.749267	1.08058	2.00905	-0.60295	-0.452397
PA1273	PA1273 cobyrinic acid a,c-diamide synthase	Biofilm (ND Only)	1.57055	1.65793	-0.453257	-0.475848	-0.672586	-0.597521	-0.597276	-0.431993
PA1296	PA1296 probable 2-hydroxyacid dehydrogenase	Biofilm (ND Only)	1.67524	1.54196	-0.614244	-0.718525	-0.585593	-0.503725	-0.328313	-0.4668
PA1311	PA1311 2-phosphonoacetaldehyde hydrolase	Biofilm (ND Only)	1.5169	1.71479	-0.60453	-0.61529	-0.520622	-0.53195	-0.46686	-0.492437
PA1329	PA1329 conserved hypothetical protein	Biofilm (TOB Only)	-0.469096	-0.509659	2.34687	0.424491	-0.303573	-0.47118	-0.509203	-0.508655
PA1349	PA1349 conserved hypothetical protein	Biofilm (TOB Only)	-0.444473	-0.307362	2.25265	0.515134	-0.822361	-0.776038	-0.173623	-0.243931
PA1367	PA1367 hypothetical protein	Planktonic (TOB Only)	-0.348896	0.485517	-0.59825	-0.823249	2.02593	0.690676	-0.699576	-0.732157
PA1380	PA1380 probable transcriptional regulator	Planktonic (TOB Only)	-0.686807	-0.550653	0.0526756	-0.477618	1.74559	1.372	-0.782216	-0.672963
PA1387	PA1387 hypothetical protein	Planktonic (TOB Only)	-0.58799	-0.689019	-0.476617	-0.903988	1.50346	1.65703	-0.215562	-0.287315
PA1414	PA1414 hypothetical protein	Biofilm (TOB Only)	-0.337993	-0.404519	2.34632	0.425764	-0.459067	-0.481276	-0.539182	-0.550046
PA1426	PA1426 hypothetical protein	Biofilm (ND Only)	1.96426	1.03247	-0.700628	-0.700628	-0.642126	-0.668756	-0.453647	0.169059
PA1430	PA1430 transcriptional regulator LasR	Biofilm (TOB Only)	-0.427172	-0.44307	2.42136	0.160431	-0.425713	-0.434707	-0.419471	-0.431659
PA1436	PA1436 probable Resistance-Nodulation-Cell Division (RND) efflux transporter	Planktonic (TOB Only)	-0.300194	-0.499418	-0.751145	-0.830803	1.22712	1.90268	-0.378483	-0.369766
PA1437	PA1437 probable two-component response regulator	Planktonic (TOB Only)	-0.54111	-0.55562	-0.607152	-0.649791	1.6217	1.60973	-0.413984	-0.463778
PA1449	PA1449 flagellar biosynthetic protein FlhB	Planktonic (TOB Only)	-0.658965	-0.689391	-0.305323	-0.63513	1.41303	1.78287	-0.393468	-0.513621
PA1451	PA1451 conserved hypothetical protein	Biofilm (ND Only)	2.09906	0.741195	-0.877366	-0.89172	-0.381784	0.111262	-0.378064	-0.422583
PA1453	PA1453 flagellar biosynthesis protein FlhF	Planktonic (ND Only)	-0.0712432	-0.811111	-0.910593	-0.883921	0.794315	-0.730445	1.57867	1.03433
PA1454	PA1454 flagellar synthesis regulator FleN	Planktonic (ND Only)	-0.499006	-0.423583	-0.868448	-0.879294	1.20865	-0.730596	1.66472	0.527557
PA1462	PA1462 probable plasmid partitioning protein	Planktonic (TOB Only)	-0.573901	-0.651183	-0.76751	-0.869369	1.08635	1.91971	0.0417215	-0.18582
PA1463	PA1463 hypothetical protein	Planktonic (ND Only)	-0.46808	-0.416041	-0.719575	-0.719575	-0.242997	-0.585086	1.8961	1.25525
PA1482	PA1482 cytochrome C-type biogenesis protein CcmH	Biofilm (ND Only)	1.59006	1.53573	-0.830001	-0.985286	-0.421929	-0.340964	-0.342108	-0.205502
PA1487	PA1487 probable carbohydrate kinase	Biofilm (ND Only)	1.63238	1.37966	-1.00181	-1.00181	-0.340216	0.101668	-0.418106	-0.351755
PA1500	PA1500 probable oxidoreductase	Biofilm (ND Only)	0.82856	2.08677	-0.896522	-0.896522	-0.232489	-0.29532	-0.426485	-0.167992
PA1507	PA1507 probable transporter	Biofilm (ND Only)	1.53269	1.20522	-1.09972	-1.31615	-0.198249	0.285678	-0.365831	-0.0436495
PA1533	PA1533 conserved hypothetical protein	Biofilm (ND Only)	1.51195	1.57188	-0.75828	-1.03423	-0.395978	-0.0697631	-0.631986	-0.193597
PA1542	PA1542 hypothetical protein	Biofilm (ND Only)	1.61417	0.885145	-0.962788	-0.999596	-0.0820627	0.876098	-0.776812	-0.554157
PA1552	PA1552 probable cytochrome c	Planktonic (TOB Only)	-0.69688	-0.732547	-0.213431	-0.199991	1.68926	1.47248	-0.677308	-0.641586
PA1567	PA1567 conserved hypothetical protein	Biofilm (TOB Only)	-0.485619	-0.523472	2.45567	-0.116686	-0.301812	-0.385537	-0.327405	-0.315135
PA1569	PA1569 probable major facilitator superfamily (MFS) transporter	TOB (Biofilm and Planktonic)	-0.884972	-1.02856	0.992493	-0.0284513	1.15449	1.29871	-0.858977	-0.644741
PA1579	PA1579 hypothetical protein	Planktonic (TOB Only)	-0.760116	-0.77775	0.343553	-0.730031	1.91366	1.00227	-0.559405	-0.43218
PA1603	PA1603 probable transcriptional regulator	Biofilm (TOB Only)	-0.557176	-0.540576	1.78711	1.43523	-0.610776	-0.571362	-0.477872	-0.464576
PA1612	PA1612 hypothetical protein	Biofilm (TOB Only)	-0.733916	-0.849093	2.04984	0.905085	0.0790333	-0.398057	-0.512541	-0.540353
PA1618	PA1618 conserved hypothetical protein	ND (Biofilm and Planktonic)	1.27815	0.93317	-1.18506	-1.16014	-0.581117	-0.662614	0.589921	0.787694
PA1619	PA1619 probable transcriptional regulator	Biofilm (ND Only)	1.29724	1.86243	-0.771618	-0.733227	-0.552193	-0.404054	-0.390032	-0.308547
PA1633	PA1633 potassium-transporting ATPase, A chain	Biofilm (ND Only)	1.17055	1.95004	-0.834975	-0.669353	-0.318524	-0.335973	-0.430336	-0.531429
PA1634	PA1634 potassium-transporting ATPase, B chain	Biofilm (ND Only)	1.16676	1.07807	-1.09741	-1.09741	-0.226494	1.21233	-0.589619	-0.446233
PA1669	PA1669 hypothetical protein	TOB (Biofilm and Planktonic)	-0.865667	-0.969981	0.971797	1.04437	0.79782	0.917117	-0.96582	-0.929638
PA1687	PA1687 spermidine synthase	Planktonic (TOB Only)	-0.736732	0.0123217	0.0541955	-0.732414	2.09433	0.725811	-0.705803	-0.711708
PA1688	PA1688 hypothetical protein	Planktonic (TOB Only)	-0.791024	0.242789	-0.325924	-0.416797	1.95057	0.958133	-0.763667	-0.854081
PA1705	PA1705 regulator in type III secretion	Biofilm (ND Only)	1.65196	1.51021	-0.76013	-0.867634	-0.345135	-0.439751	-0.556859	-0.19266
PA1709	PA1709 Translocator outer membrane protein PopD precursor	Biofilm (ND Only)	1.26305	1.91126	-0.622856	-0.718819	-0.477094	-0.383495	-0.482562	-0.489484
PA1717	PA1717 type III export protein PscD	Biofilm (ND Only)	1.10734	1.78646	-0.687688	0.505018	-0.632663	-0.595741	-0.738914	-0.743808
PA1718	PA1718 type III export protein PscE	Biofilm (ND Only)	1.33146	1.64277	-0.965714	-1.05	-0.251475	0.0352431	-0.648135	-0.0941392
PA1723	PA1723 type III export protein PscJ	Biofilm (TOB Only)	-0.638065	-0.757255	1.62234	1.53	-0.796872	-0.535923	-0.0810773	-0.34315
PA1728	PA1728 hypothetical protein	Planktonic (ND Only)	-0.759921	-0.759921	-0.593221	1.07639	-0.747601	-0.685308	1.59294	0.876643
PA1729	PA1729 conserved hypothetical protein	Planktonic (ND Only)	-0.741471	-0.755752	-0.57434	1.14235	-0.647293	-0.71893	1.72818	0.567255
PA1732	PA1732 conserved hypothetical protein	Biofilm (TOB Only)	-0.632876	-0.706384	0.976422	1.77064	-0.657641	0.712937	-0.751678	-0.711422
PA1790	PA1790 hypothetical protein	Biofilm (ND Only)	1.55093	1.32578	-0.893365	-1.25146	-0.479468	0.299205	-0.299475	-0.25214
PA1811	PA1811 probable solute-binding protein	Planktonic (TOB Only)	-0.374267	-0.50034	-0.499405	-0.766002	1.52655	1.69168	-0.543356	-0.534854
PA1813	PA1813 probable hydroxyacylglutathione hydrolase	Planktonic (TOB Only)	-0.791446	-0.799349	0.749825	-0.424102	1.49636	1.27328	-0.739188	-0.765384
PA1814	PA1814 hypothetical protein	Planktonic (TOB Only)	-0.523181	-0.73783	0.494305	-0.743222	1.48725	1.46197	-0.71167	-0.72762
PA1816	PA1816 DNA polymerase III, epsilon chain	Planktonic (TOB Only)	-0.566121	-0.0427365	-0.461617	-1.1104	1.33295	1.74346	-0.532078	-0.363458
PA1822	PA1822 hypothetical protein	Biofilm (TOB Only)	0.315425	-1.11119	1.94318	0.527722	-0.157907	0.220146	-0.74894	-0.988435
PA1823	PA1823 conserved hypothetical protein	TOB (Biofilm and Planktonic)	-0.791581	-0.780422	-0.198609	1.02563	1.5636	0.883197	-0.848055	-0.85376
PA1833	PA1833 probable oxidoreductase	Biofilm (ND Only)	1.92744	1.23029	-0.684234	-0.732458	-0.381476	-0.401765	-0.502065	-0.455729
PA1842	PA1842 hypothetical protein	Biofilm (ND Only)	1.93943	1.20458	-0.246349	-0.711748	-0.660767	-0.559237	-0.530252	-0.435656
PA1848	PA1848 probable major facilitator superfamily (MFS) transporter	Biofilm (TOB Only)	-1.15954	-1.12196	1.28244	1.43501	-0.159453	-0.491872	0.556141	-0.340753
PA1853	PA1853 probable transcriptional regulator	Planktonic (TOB Only)	-0.654478	-0.644264	-0.5221	-0.455436	1.43087	1.78476	-0.505692	-0.433668
PA1886	PA1886 DNA polymerase II	Planktonic (ND Only)	0.273159	-0.229124	-0.993932	-1.01379	-0.632588	-0.129884	1.96484	0.76132
PA1916	PA1916 probable amino acid permease	Planktonic (TOB Only)	-0.543258	-0.559242	-0.491381	-0.634045	1.22656	1.94827	-0.464552	-0.482346
PA1935	PA1935 hypothetical protein	Biofilm (TOB Only)	-0.40258	0.0332524	1.86674	1.22241	-0.60452	-0.711576	-0.722039	-0.681687
PA1946	PA1946 binding protein component precursor of ABC ribose transporter	Biofilm (TOB Only)	-0.672754	0.436956	1.33503	1.6381	-0.577723	-0.706071	-0.758933	-0.694615
PA1947	PA1947 ribose transport protein RbsA	Biofilm (TOB Only)	-0.492958	-0.515426	0.896512	2.15467	-0.524941	-0.51933	-0.523654	-0.474876
PA1952	PA1952 hypothetical protein	Planktonic (TOB Only)	-0.52987	-0.75748	0.152408	-0.235948	1.76299	1.26086	-0.790947	-0.862013
PA1981	PA1981 hypothetical protein	Biofilm (ND Only)	1.93288	1.17392	-0.733463	-0.856618	-0.476644	-0.216195	-0.431999	-0.39188
PA2030	PA2030 hypothetical protein	Planktonic (TOB Only)	-0.195926	-0.959248	-0.00142055	-0.299453	1.62953	1.42235	-0.799469	-0.796361
PA2060	PA2060 probable permease of ABC transporter	Biofilm (ND Only)	0.931891	1.97239	-1.00613	0.0871872	-0.568016	-0.107921	-0.532582	-0.776812
PA2064	PA2064 copper resistance protein B precursor	Biofilm (ND Only)	1.59904	1.63414	-0.58777	-0.58777	-0.411858	-0.470246	-0.58777	-0.58777
PA2095	PA2095 hypothetical protein	Biofilm (TOB Only)	-0.590156	-0.845418	1.39258	1.56161	0.333324	-0.170633	-0.892833	-0.788478
PA2103	PA2103 probable molybdopterin biosynthesis protein MoeB	Planktonic (TOB Only)	-0.340835	-0.631309	0.500998	-0.965192	1.74036	1.12148	-0.718794	-0.706711
PA2107	PA2107 hypothetical protein	Biofilm (ND Only)	1.61626	1.50509	-0.697051	-0.883502	-0.349557	-0.081427	-0.79077	-0.31905
PA2110	PA2110 hypothetical protein	Biofilm (ND Only)	0.386427	2.35917	-0.503842	-0.503842	-0.503842	-0.326639	-0.503842	-0.403587
PA2113	PA2113 pyroglutamate porin OpdO	Planktonic (TOB Only)	0.41766	-0.272016	-0.64302	-1.07925	0.826015	1.94209	-0.664691	-0.526784
PA2114	PA2114 probable major facilitator superfamily (MFS) transporter	Biofilm (ND Only)	0.0434368	2.44276	-0.423103	-0.423103	-0.406501	-0.390923	-0.419459	-0.423103
PA2115	PA2115 probable transcriptional regulator	Biofilm (ND Only)	1.2413	1.90409	-0.548815	-0.6995	-0.492568	-0.168437	-0.681966	-0.554106
PA2123	PA2123 probable transcriptional regulator	Planktonic (ND Only)	-0.192263	-0.78788	-1.07012	0.125505	-0.451025	-0.559484	1.89015	1.04512
PA2127	PA2127 conserved hypothetical protein	Planktonic (TOB Only)	-0.612842	-0.553236	-0.648153	-0.824955	1.69397	1.47787	-0.371636	-0.161026
PA2128	PA2128 fimbrial subunit CupA1	Biofilm (TOB Only)	-0.577898	-0.57486	1.77578	1.44767	-0.468241	-0.576493	-0.578351	-0.447605
PA2131	PA2131 fimbrial subunit CupA4	Planktonic (ND Only)	-0.822987	-0.935435	-1.20713	-0.105984	0.269935	0.0159522	1.50737	1.27827
PA2142	PA2142 probable short-chain dehydrogenase	Biofilm (ND Only)	1.60724	1.19645	-1.10996	-1.10996	-0.224263	0.376204	-0.539299	-0.196408
PA2155	PA2155 probable phospholipase	Biofilm (ND Only)	2.20722	0.709874	-0.351515	-0.669781	-0.268335	-0.287898	-0.669781	-0.669781
PA2160	PA2160 probable glycosyl hydrolase	Biofilm (ND Only)	2.12053	0.892941	-0.124401	-0.653273	-0.571255	-0.537103	-0.645566	-0.481873
PA2164	PA2164 probable glycosyl hydrolase	Biofilm (ND Only)	1.52503	1.51257	-0.865666	-1.02515	-0.0236706	-0.0767042	-0.650047	-0.396366
PA2196	PA2196 probable transcriptional regulator	Biofilm (TOB Only)	-0.680957	-0.629967	2.15205	0.832662	-0.428681	-0.141513	-0.583562	-0.520037
PA2197	PA2197 conserved hypothetical protein	Planktonic (TOB Only)	-0.62798	-0.641029	-0.0404955	-0.674006	1.67913	1.48903	-0.57799	-0.60666
PA2198	PA2198 hypothetical protein	Planktonic (TOB Only)	-0.502527	-0.515556	-0.519541	-0.633301	2.27106	0.624332	-0.342988	-0.381479
PA2219	PA2219 membrane protein OpdE	Planktonic (TOB Only)	-0.576618	-0.515044	-0.111865	-0.670944	1.60636	1.58051	-0.654884	-0.657505
PA2229	PA2229 conserved hypothetical protein	Biofilm (TOB Only)	-0.34793	-0.368092	2.44466	0.0221766	-0.44247	-0.428147	-0.447609	-0.432592
PA2246	PA2246 transcriptional regulator BkdR	Planktonic (TOB Only)	-0.864125	-0.833066	-0.674424	0.8032	1.99072	0.373522	-0.539614	-0.256214
PA2250	PA2250 lipoamide dehydrogenase-Val	TOB (Biofilm and Planktonic)	-0.891294	-0.908957	0.184198	0.153983	1.74273	1.13347	-0.702255	-0.711867
PA2285	PA2285 hypothetical protein	ND (Biofilm and Planktonic)	1.02561	0.630471	-1.23124	-1.37169	-0.519366	-0.188808	0.338523	1.3165
PA2287	PA2287 hypothetical protein	Biofilm (ND Only)	1.82372	0.971679	-1.12767	-1.10133	-0.319689	-0.154572	-0.285817	0.193679
PA2290	PA2290 glucose dehydrogenase	Biofilm (TOB Only)	-0.0514014	-0.282308	1.49383	1.61638	-0.574457	-0.450526	-0.933058	-0.81846
PA2305	PA2305 probable non-ribosomal peptide synthetase	Planktonic (TOB Only)	-0.689124	-0.79952	-0.37576	-0.363015	1.78527	1.40159	-0.502321	-0.457114
PA2315	PA2315 hypothetical protein	Planktonic (TOB Only)	-0.334827	-0.57284	-0.0389336	-0.652404	1.62747	1.51445	-0.779029	-0.763881
PA2317	PA2317 probable oxidoreductase	Planktonic (TOB Only)	-0.818206	-0.557439	0.679846	-0.342598	1.20564	1.57261	-0.868162	-0.871694
PA2327	PA2327 probable permease of ABC transporter	Planktonic (TOB Only)	-0.427644	-0.569165	-0.621844	-0.292537	1.3342	1.85129	-0.608589	-0.665709
PA2336	PA2336 hypothetical protein	Biofilm (ND Only)	1.54073	1.38721	-1.00906	-1.10062	-0.376052	0.266856	-0.418643	-0.290429
PA2344	PA2344 fructokinase	Biofilm (ND Only)	0.192718	2.39407	-0.556747	-0.615535	-0.306933	-0.207451	-0.456026	-0.444099
PA2349	PA2349 conserved hypothetical protein	Biofilm (ND Only)	2.19926	0.646004	-0.769145	-0.853436	-0.419368	-0.159875	-0.415465	-0.227971
PA2353	PA2353 conserved hypothetical protein	Biofilm (ND Only)	1.15061	1.96	-0.524364	-0.880322	-0.629295	-0.337608	-0.342161	-0.39686
PA2357	PA2357 NADH-dependent FMN reductase MsuE	Planktonic (TOB Only)	-0.151536	0.397658	-0.76199	-0.979057	2.04064	0.615106	-0.758486	-0.402331
PA2358	PA2358 hypothetical protein	Biofilm (ND Only)	0.378271	2.33112	-0.681784	-0.706515	-0.363527	-0.437566	-0.258433	-0.26156
PA2360	PA2360 hypothetical protein	Biofilm (TOB Only)	-0.661006	0.0274205	1.18564	0.96235	0.0324707	0.985918	-1.42431	-1.10848
PA2362	PA2362 hypothetical protein	Biofilm (ND Only)	0.944089	1.37332	-0.973221	1.24216	-0.601877	-0.470805	-0.796104	-0.717557
PA2375	PA2375 hypothetical protein	Biofilm (ND Only)	2.03573	0.80873	-0.752487	-1.05125	-0.512013	-0.279247	-0.406828	0.157371
PA2392	PA2392 PvdP	Planktonic (TOB Only)	-0.521988	-0.429608	0.228693	-1.05405	1.61794	1.40607	-0.683917	-0.563143
PA2428	PA2428 hypothetical protein	ND (Biofilm and Planktonic)	2.40189	-0.210212	-0.637765	-0.655764	-0.413351	-0.419286	-0.0087258	-0.0567865
PA2429	PA2429 hypothetical protein	Biofilm (ND Only)	1.57529	0.428816	-0.846213	-1.19123	-0.345102	-0.374167	1.28657	-0.53396
PA2438	PA2438 hypothetical protein	Biofilm (TOB Only)	0.345499	-0.357354	0.562286	2.14743	-0.692422	-0.613499	-0.67662	-0.715317
PA2450	PA2450 hypothetical protein	TOB (Biofilm and Planktonic)	-1.10823	-1.14977	1.03435	0.47437	1.0064	1.10303	-0.69469	-0.665452
PA2467	PA2467 Anti-sigma factor FoxR	Planktonic (TOB Only)	-0.497164	-0.0384321	-0.555025	-0.775969	1.31106	1.82186	-0.659216	-0.607105
PA2468	PA2468 ECF sigma factor FoxI	Planktonic (TOB Only)	-0.523299	-0.305587	-0.33311	-1.00216	1.44941	1.69885	-0.339812	-0.644296
PA2481	PA2481 hypothetical protein	Biofilm (TOB Only)	-0.220563	-0.472152	1.20404	1.71883	0.197877	-0.356059	-0.958892	-1.11308
PA2484	PA2484 conserved hypothetical protein	Biofilm (TOB Only)	-0.575104	-0.405716	0.923996	2.13498	-0.576144	-0.424196	-0.536284	-0.541532
PA2493	PA2493 Resistance-Nodulation-Cell Division (RND) multidrug efflux membrane fusion protein MexE precursor	TOB (Biofilm and Planktonic)	-1.213	-1.21739	0.17718	0.147001	1.54364	1.18901	-0.293035	-0.333415
PA2495	PA2495 Multidrug efflux outer membrane protein OprN precursor	Biofilm (ND Only)	1.51064	1.58256	-0.957369	-0.741509	-0.372144	-0.542825	-0.555138	0.0757809
PA2501	PA2501 hypothetical protein	Biofilm (ND Only)	1.34468	1.86091	-0.57744	-0.57744	-0.552056	-0.428589	-0.512738	-0.557329
PA2504	PA2504 hypothetical protein	Biofilm (ND Only)	0.927646	2.0631	-0.76159	-0.903774	-0.471426	-0.33358	-0.167043	-0.353333
PA2520	PA2520 Resistance-Nodulation-Cell Division (RND) divalent metal cation efflux transporter CzcA	Biofilm (ND Only)	1.35934	1.75034	-0.86307	-0.901498	-0.411267	-0.178144	-0.228653	-0.527042
PA2523	PA2523 probable two-component response regulator	Biofilm (ND Only)	2.43428	-0.00192466	-0.571497	-0.571497	-0.334086	-0.280105	-0.298422	-0.376747
PA2524	PA2524 probable two-component sensor	Biofilm (ND Only)	2.13467	0.882503	-0.650877	-0.670899	-0.551807	-0.335364	-0.557467	-0.250762
PA2528	PA2528 probable Resistance-Nodulation-Cell Division (RND) efflux membrane fusion protein precursor	Biofilm (ND Only)	1.44343	1.62813	-0.855949	-1.0818	-0.436189	-0.265348	-0.281926	-0.150357
PA2538	PA2538 hypothetical protein	ND (Biofilm and Planktonic)	0.34763	-0.192709	-0.747698	-0.928342	-0.231414	-0.400676	-0.125248	2.27846
PA2566	PA2566 conserved hypothetical protein	Biofilm (ND Only)	1.87852	0.800733	-0.996565	-0.996565	-0.68265	-0.402811	-0.0608115	0.460146
PA2567	PA2567 hypothetical protein	Planktonic (ND Only)	1.15351	-0.22674	-1.30883	-1.50296	0.400177	-0.208381	0.779623	0.91361
PA2593	PA2593 hypothetical protein	TOB (Biofilm and Planktonic)	-1.03841	-0.0733408	0.00080465	0.162345	1.8632	0.889442	-0.906749	-0.897294
PA2637	PA2637 NADH dehydrogenase I chain A	Biofilm (TOB Only)	-0.751748	-0.83106	1.89421	0.77758	0.0391581	0.490274	-0.806611	-0.811805
PA2638	PA2638 NADH dehydrogenase I chain B	TOB (Biofilm and Planktonic)	-0.874796	-0.91051	1.1087	0.456849	0.902991	1.18571	-0.934813	-0.934131
PA2639	PA2639 NADH dehydrogenase I chain C,D	TOB (Biofilm and Planktonic)	-0.90064	-0.914187	0.909116	0.522238	0.915071	1.31085	-0.942322	-0.900126
PA2640	PA2640 NADH dehydrogenase I chain E	TOB (Biofilm and Planktonic)	-0.77834	-0.675395	0.870283	-0.153314	1.27967	1.32928	-0.940236	-0.931952
PA2641	PA2641 NADH dehydrogenase I chain F	TOB (Biofilm and Planktonic)	-0.402882	-0.25804	0.787233	-0.0510957	0.996853	1.42626	-1.24986	-1.24847
PA2642	PA2642 NADH dehydrogenase I chain G	TOB (Biofilm and Planktonic)	-0.827002	-0.76384	1.12172	0.000277699	1.02659	1.30108	-0.93134	-0.927496
PA2643	PA2643 NADH dehydrogenase I chain H	TOB (Biofilm and Planktonic)	-0.771968	-0.845207	1.09354	-0.029765	1.07888	1.29379	-0.920108	-0.899164
PA2644	PA2644 NADH Dehydrogenase I chain I	TOB (Biofilm and Planktonic)	-0.718322	-0.776371	0.159092	0.055064	0.953173	1.9172	-0.844665	-0.745168
PA2645	PA2645 NADH dehydrogenase I chain J	Planktonic (TOB Only)	-0.65569	-0.56779	-0.142243	-0.158052	1.34254	1.77094	-0.783227	-0.806474
PA2646	PA2646 NADH dehydrogenase I chain K	TOB (Biofilm and Planktonic)	-0.888869	-0.912724	0.935701	0.441355	0.827772	1.40769	-0.90804	-0.902881
PA2647	PA2647 NADH dehydrogenase I chain L	TOB (Biofilm and Planktonic)	-0.761557	-0.786259	0.58929	0.306601	0.89722	1.6571	-0.954051	-0.948345
PA2649	PA2649 NADH dehydrogenase I chain N	TOB (Biofilm and Planktonic)	-0.762691	-0.744507	0.543972	-0.160876	1.10734	1.70183	-0.847189	-0.837886
PA2650	PA2650 conserved hypothetical protein	Planktonic (TOB Only)	-0.705943	-0.821495	0.916593	-0.277422	1.09607	1.49991	-0.868342	-0.839376
PA2653	PA2653 probable transporter	Biofilm (TOB Only)	-0.63507	-0.621245	1.07269	2.04549	-0.451532	-0.391963	-0.511016	-0.507351
PA2657	PA2657 probable two-component response regulator	Biofilm (ND Only)	1.53795	1.26662	-0.127642	0.0922258	-0.134897	-0.216113	-1.30114	-1.11701
PA2662	PA2662 conserved hypothetical protein	Biofilm (ND Only)	1.32822	1.81598	-0.591761	-0.0390298	-0.629949	-0.562837	-0.641789	-0.678836
PA2669	PA2669 hypothetical protein	Planktonic (TOB Only)	-0.485188	-0.463122	-0.121128	-0.893906	1.49971	1.65889	-0.700185	-0.495064
PA2670	PA2670 hypothetical protein	Planktonic (TOB Only)	-0.77633	-0.765762	0.00841389	-0.683867	1.67049	1.46098	-0.473414	-0.440513
PA2672	PA2672 probable type II secretion system protein	TOB (Biofilm and Planktonic)	-0.91658	-0.899856	1.58095	0.710678	0.667415	0.607262	-0.890164	-0.859701
PA2673	PA2673 probable type II secretion system protein	Planktonic (TOB Only)	-0.703444	-0.707101	0.379633	-0.653292	1.31868	1.68189	-0.648612	-0.667755
PA2674	PA2674 probable type II secretion system protein	Planktonic (TOB Only)	-0.820212	-0.812968	0.74243	-0.556876	1.45186	1.33948	-0.679348	-0.664371
PA2685	PA2685 conserved hypothetical protein	Planktonic (TOB Only)	-0.739353	-0.799458	-0.129898	-0.798887	1.51256	1.62654	-0.326305	-0.345204
PA2705	PA2705 hypothetical protein	Biofilm (TOB Only)	-0.328012	-0.446217	1.76658	1.42176	-0.852381	-0.602174	-0.451823	-0.50773
PA2708	PA2708 hypothetical protein	TOB (Biofilm and Planktonic)	-0.885988	-1.14344	-0.124697	0.512615	1.105	1.66468	-0.545498	-0.582665
PA2717	PA2717 chloroperoxidase precursor	ND (Biofilm and Planktonic)	0.618375	1.2662	-1.39696	-1.39696	-0.54305	0.316806	0.756658	0.378925
PA2722	PA2722 hypothetical protein	Biofilm (TOB Only)	-0.459156	-0.629147	1.31153	1.88473	-0.584638	-0.560634	-0.509347	-0.453331
PA2723	PA2723 hypothetical protein	Biofilm (TOB Only)	-0.375317	-0.434819	-0.118695	2.46257	-0.430838	-0.386115	-0.350876	-0.365914
PA2727	PA2727 hypothetical protein	Biofilm (ND Only)	1.61763	1.33411	-0.807289	-1.25632	-0.20531	-0.0210238	-0.567294	-0.0945054
PA2734	PA2734 hypothetical protein	Biofilm (ND Only)	0.513307	2.07155	-0.705643	0.615967	-0.635351	-0.700201	-0.607439	-0.552191
PA2738	PA2738 integration host factor, alpha subunit	Planktonic (TOB Only)	0.458872	0.31721	-1.27934	-1.41998	0.938358	1.43322	-0.24187	-0.206469
PA2771	PA2771 conserved hypothetical protein	Biofilm (TOB Only)	-0.900898	-0.876679	1.52324	0.983544	-0.00975187	0.902976	-0.794268	-0.828167
PA2777	PA2777 conserved hypothetical protein	Planktonic (TOB Only)	-0.629692	-0.706972	0.0147186	-0.664855	1.74285	1.39891	-0.579694	-0.575261
PA2779	PA2779 hypothetical protein	Planktonic (ND Only)	-0.174881	-0.355531	-0.68381	-0.706067	-0.640578	-0.617786	1.71772	1.46094
PA2780	PA2780 hypothetical protein	Planktonic (ND Only)	-0.551678	-0.69371	-0.634072	0.232145	-0.712871	-0.702516	1.71396	1.34874
PA2781	PA2781 hypothetical protein	Planktonic (ND Only)	-0.722851	-0.72579	-0.504216	0.317738	-0.680431	-0.693415	1.75426	1.2547
PA2789	PA2789 hypothetical protein	Biofilm (ND Only)	1.64978	1.27822	-1.0369	-1.0369	-0.366706	0.197867	-0.54952	-0.135842
PA2810	PA2810 two-component sensor, CopS	Biofilm (ND Only)	0.15864	2.39644	-0.630488	-0.636838	-0.413171	-0.324531	-0.247334	-0.302716
PA2824	PA2824 probable sensor/response regulator hybrid	Biofilm (TOB Only)	-0.33404	-0.35138	1.15184	1.62531	-1.10447	-1.21662	0.302086	-0.0727268
PA2837	PA2837 probable outer membrane protein precursor	Planktonic (ND Only)	0.554865	-0.191285	-1.05442	-1.18856	-0.339665	-0.51807	1.34267	1.39447
PA2838	PA2838 probable transcriptional regulator	Biofilm (ND Only)	1.75908	1.40835	-0.491701	-0.837303	-0.147889	-0.511381	-0.609298	-0.569854
PA2842	PA2842 hypothetical protein	Planktonic (TOB Only)	-0.575792	-0.577272	-0.508448	-0.557416	1.09663	2.03574	-0.425447	-0.487996
PA2868	PA2868 hypothetical protein	Biofilm (ND Only)	1.81669	1.15897	-0.867867	-0.948835	-0.599314	0.185198	-0.24575	-0.499088
PA2869	PA2869 hypothetical protein	Planktonic (ND Only)	0.0482433	0.501168	-0.913699	-1.00773	-0.498203	-0.776032	1.84485	0.801402
PA2871	PA2871 hypothetical protein	Biofilm (ND Only)	1.50618	1.44947	-0.912537	-1.07081	-0.615687	-0.508536	0.106594	0.0453307
PA2872	PA2872 hypothetical protein	Biofilm (ND Only)	1.86874	1.02895	-1.10602	-0.326716	-0.227908	0.19684	-0.704238	-0.729655
PA2873	PA2873 hypothetical protein	Biofilm (TOB Only)	-0.903532	-1.0138	1.27887	1.60433	0.418036	-0.171728	-0.544805	-0.667378
PA2894	PA2894 hypothetical protein	Biofilm (ND Only)	0.543578	2.26612	-0.57189	-0.767192	-0.21153	-0.194409	-0.578514	-0.486164
PA2918	PA2918 probable short-chain dehydrogenase	ND (Biofilm and Planktonic)	2.00249	0.440958	-1.04427	-1.04427	-0.583472	-0.333603	0.33043	0.231731
PA2936	PA2936 hypothetical protein	TOB (Biofilm and Planktonic)	-0.859273	-0.866965	0.478134	0.0327246	1.43029	1.39327	-0.815648	-0.792536
PA2942	PA2942 probable magnesium chelatase	Biofilm (TOB Only)	-0.405742	-0.439939	1.11872	2.01501	-0.58122	-0.450831	-0.618067	-0.637931
PA2960	PA2960 type 4 fimbrial biogenesis protein PilZ	Biofilm (ND Only)	1.65849	1.58103	-0.545829	-0.545829	-0.545829	-0.544688	-0.541211	-0.51613
PA2965	PA2965 beta-ketoacyl-acyl carrier protein synthase II	Biofilm (ND Only)	0.882987	2.1614	-0.530235	-0.530235	-0.505182	-0.464588	-0.530235	-0.483915
PA2980	PA2980 conserved hypothetical protein	Planktonic (ND Only)	-0.440126	-0.533436	-0.595555	-0.77489	-0.248451	-0.601585	1.74195	1.4521
PA3001	PA3001 probable glyceraldehyde-3-phosphate dehydrogenase	Biofilm (ND Only)	1.85308	1.21616	-0.87871	-0.962963	-0.296836	-0.277444	-0.394182	-0.25911
PA3024	PA3024 probable carbohydrate kinase	Biofilm (ND Only)	1.3595	1.81293	-0.645827	-0.711504	-0.26423	-0.306787	-0.577809	-0.666272
PA3040	PA3040 conserved hypothetical protein	Biofilm (ND Only)	1.69722	0.959799	-1.10757	-1.13172	-0.481669	0.516542	-0.437799	-0.014804
PA3048	PA3048 conserved hypothetical protein	TOB (Biofilm and Planktonic)	-0.958619	-0.952941	0.84605	0.407378	1.0948	1.27548	-0.853323	-0.85883
PA3049	PA3049 ribosome modulation factor	TOB (Biofilm and Planktonic)	-1.28107	-1.21551	0.314368	0.92495	0.891333	1.29454	-0.351225	-0.577381
PA3055	PA3055 hypothetical protein	TOB (Biofilm and Planktonic)	-0.959725	-0.952797	0.256916	-0.817539	0.98735	1.84005	-0.0954453	-0.258808
PA3057	PA3057 hypothetical protein	TOB (Biofilm and Planktonic)	-1.19592	-1.24911	1.21889	1.07144	0.586068	0.660247	-0.528279	-0.563327
PA3058	PA3058 PelG	Planktonic (TOB Only)	-0.768966	-0.728139	0.703905	-0.406397	1.60731	1.17533	-0.792401	-0.790643
PA3060	PA3060 PelE	Biofilm (ND Only)	2.19604	0.39334	-0.826499	-0.894325	-0.461465	0.272889	-0.237153	-0.44283
PA3090	PA3090 hypothetical protein	Biofilm (ND Only)	1.1903	1.74645	-1.26103	0.0357705	-0.490076	-0.0416373	-0.633483	-0.546288
PA3091	PA3091 hypothetical protein	Biofilm (ND Only)	0.9548	2.04651	-0.683006	-0.845747	-0.251823	-0.520809	-0.613351	-0.0865773
PA3104	PA3104 secretion protein XcpP	ND (Biofilm and Planktonic)	0.0608404	0.420824	-0.949238	-1.00813	-0.66163	-0.198016	0.246275	2.08907
PA3107	PA3107 o-succinylhomoserine sulfhydrylase	Biofilm (ND Only)	1.21331	1.6245	-0.864956	-0.897236	-0.612366	0.60457	-0.645957	-0.421856
PA3114	PA3114 tRNA-pseudouridine synthase I	Biofilm (ND Only)	1.93032	1.06263	-0.592764	0.172077	-0.750301	-0.856664	-0.504641	-0.460661
PA3119	PA3119 conserved hypothetical protein	Biofilm (ND Only)	0.485258	2.32063	-0.581036	-0.613717	-0.447423	-0.463576	-0.301274	-0.398862
PA3122	PA3122 probable transcriptional regulator	Planktonic (TOB Only)	-0.587181	-0.693997	-0.236713	-0.701969	1.82846	1.34926	-0.445124	-0.512734
PA3126	PA3126 heat-shock protein IbpA	Biofilm (ND Only)	1.81073	1.38637	-0.264985	-0.572449	-0.638126	-0.638126	-0.539252	-0.544163
PA3131	PA3131 probable aldolase	Biofilm (ND Only)	2.07472	0.626945	-0.813569	-1.03742	-0.476446	0.256042	-0.506377	-0.123902
PA3170	PA3170 conserved hypothetical protein	Biofilm (ND Only)	1.50433	1.5881	-0.895449	0.0408328	-0.801685	-0.707246	-0.326309	-0.402572
PA3222	PA3222 hypothetical protein	TOB (Biofilm and Planktonic)	-0.820672	-0.83627	1.24925	-0.0929392	1.04409	1.2019	-0.867047	-0.87831
PA3228	PA3228 probable ATP-binding/permease fusion ABC transporter	ND (Biofilm and Planktonic)	0.329196	2.26177	-0.765906	-0.765906	-0.638898	-0.440203	-0.0079364	0.0278837
PA3238	PA3238 hypothetical protein	ND (Biofilm and Planktonic)	1.97363	0.688638	-0.891564	-1.06479	-0.64993	-0.402641	0.00407023	0.342585
PA3246	PA3246 pseudouridine synthase RluA	Biofilm (ND Only)	1.45217	1.51951	-0.784041	-1.14647	-0.0572333	0.139041	-0.563203	-0.559784
PA3250	PA3250 hypothetical protein	ND (Biofilm and Planktonic)	1.22618	1.0172	-1.19026	-1.23253	-0.628426	-0.42516	0.308181	0.924823
PA3255	PA3255 hypothetical protein	Planktonic (TOB Only)	-0.820072	-0.83349	1.46895	-0.50713	1.52776	0.379346	-0.582349	-0.633012
PA3280	PA3280 Pyrophosphate-specific outer membrane porin OprO precursor	Planktonic (TOB Only)	-0.727319	-0.736985	-0.071308	-0.773074	1.79648	1.32455	-0.487956	-0.324396
PA3286	PA3286 hypothetical protein	Biofilm (TOB Only)	-0.475969	-0.532792	1.01779	2.07946	-0.643606	-0.593619	-0.442691	-0.408576
PA3295	PA3295 probable HIT family protein	Biofilm (ND Only)	1.5953	1.58791	-0.79218	-0.670085	-0.569491	-0.371012	-0.602926	-0.177514
PA3313	PA3313 hypothetical protein	Planktonic (TOB Only)	-0.558667	-0.71934	-0.808748	-0.71977	1.88337	1.18895	-0.0990011	-0.166793
PA3320	PA3320 hypothetical protein	Planktonic (TOB Only)	-0.729348	-0.721758	-0.409608	-0.742186	1.7888	1.36638	-0.208463	-0.343825
PA3321	PA3321 probable transcriptional regulator	TOB (Biofilm and Planktonic)	-0.87628	-0.86922	0.17519	0.161318	1.76957	1.10263	-0.698396	-0.764815
PA3326	PA3326 probable Clp-family ATP-dependent protease	Biofilm (ND Only)	2.24083	0.513374	-0.668558	-0.747119	-0.570467	-0.533327	-0.307853	0.0731241
PA3327	PA3327 probable non-ribosomal peptide synthetase	TOB (Biofilm and Planktonic)	-1.00811	-1.04056	1.01924	0.154429	1.39267	0.925201	-0.751515	-0.691355
PA3328	PA3328 probable FAD-dependent monooxygenase	ND (Biofilm and Planktonic)	1.93901	0.536894	-1.02678	-1.02678	-0.591553	-0.509701	0.299036	0.37987
PA3344	PA3344 ATP-dependent DNA helicase RecQ	Biofilm (TOB Only)	-0.583287	-0.426711	1.64698	1.58488	-0.623916	-0.617603	-0.457924	-0.522415
PA3345	PA3345 hypothetical protein	Biofilm (ND Only)	1.78026	1.43188	-0.586322	-0.629285	-0.60557	-0.599372	-0.421712	-0.369882
PA3347	PA3347 hypothetical protein	Biofilm (TOB Only)	-1.15997	-1.10365	1.77572	0.8776	0.0679431	0.382685	-0.487047	-0.353278
PA3350	PA3350 hypothetical protein	Planktonic (ND Only)	-0.549306	-0.598566	-0.982008	-1.05622	0.148486	0.135943	1.52042	1.38125
PA3351	PA3351 FlgM	Planktonic (ND Only)	-0.102721	-0.555096	-0.682297	-0.957971	-0.46392	-0.374522	1.45943	1.6771
PA3363	PA3363 aliphatic amidase regulator	TOB (Biofilm and Planktonic)	-0.802991	-1.00529	0.729824	0.140638	1.03328	1.54307	-0.795953	-0.842565
PA3365	PA3365 probable chaperone	ND (Biofilm and Planktonic)	0.478483	2.07138	-0.855672	-0.88245	-0.572902	-0.654894	-0.0428665	0.458921
PA3369	PA3369 hypothetical protein	Planktonic (ND Only)	-0.432318	-0.306489	-0.626759	-0.595304	-0.679957	-0.57547	1.55264	1.66366
PA3370	PA3370 hypothetical protein	Planktonic (ND Only)	-0.138911	-0.144859	-0.792352	-0.792352	-0.593506	-0.60728	1.904	1.16526
PA3371	PA3371 hypothetical protein	ND (Biofilm and Planktonic)	1.33723	0.446476	-1.24263	-1.28829	-0.447104	-0.452284	0.667481	0.979119
PA3379	PA3379 conserved hypothetical protein	Biofilm (ND Only)	1.98877	1.09169	-0.797952	-0.797952	-0.429961	-0.232948	-0.448803	-0.372842
PA3383	PA3383 binding protein component of ABC phosphonate transporter	Planktonic (TOB Only)	-0.0549678	-0.669433	-0.857152	-1.00914	1.64162	1.41191	-0.220646	-0.242188
PA3403	PA3403 hypothetical protein	Biofilm (TOB Only)	-0.950524	-1.04293	1.68827	1.30272	0.0663129	-0.133769	-0.522569	-0.407518
PA3407	PA3407 heme acquisition protein HasAp	Biofilm (ND Only)	1.53737	1.38713	-0.996245	-1.1132	-0.474594	-0.0461795	-0.471166	0.17689
PA3410	PA3410 probable sigma-70 factor, ECF subfamily	Planktonic (TOB Only)	-0.00808108	0.333822	-0.602443	-0.905066	1.6285	1.26005	-0.924602	-0.782176
PA3412	PA3412 hypothetical protein	Planktonic (ND Only)	-0.197705	-0.0973109	-0.74217	-0.724574	-0.63986	-0.546925	2.11463	0.833919
PA3414	PA3414 hypothetical protein	Planktonic (ND Only)	-0.373242	-0.380412	-0.429906	-0.429906	-0.401984	-0.389392	2.45571	-0.0508741
PA3445	PA3445 conserved hypothetical protein	TOB (Biofilm and Planktonic)	-1.15813	-1.27889	0.919097	0.0531241	1.18361	1.17115	-0.504536	-0.385419
PA3447	PA3447 probable ATP-binding component of ABC transporter	Biofilm (ND Only)	1.14768	1.55336	-1.11287	-1.18236	-0.367501	0.5532	-0.202512	-0.388993
PA3455	PA3455 conserved hypothetical protein	Planktonic (ND Only)	0.00969679	-0.0550404	-0.967032	-0.967032	-0.538744	-0.474405	1.75471	1.23785
PA3460	PA3460 probable acetyltransferase	Planktonic (TOB Only)	-0.490649	-0.504852	-0.63393	-0.573667	1.67084	1.56481	-0.516185	-0.516368
PA3470	PA3470 hypothetical protein	Biofilm (TOB Only)	-0.555418	-0.531506	1.49316	1.70479	-0.737198	-0.716627	-0.317911	-0.339283
PA3476	PA3476 autoinducer synthesis protein RhlI	Biofilm (TOB Only)	-0.696178	-0.599545	1.05131	2.01039	-0.65046	-0.707965	-0.17531	-0.232235
PA3479	PA3479 rhamnosyltransferase chain A	Biofilm (ND Only)	0.812868	2.08261	-0.781971	-0.852741	-0.66914	-0.45346	-0.0544368	-0.0837258
PA3486	PA3486 conserved hypothetical protein	Biofilm (TOB Only)	-0.716205	-0.622136	1.05611	1.12092	-0.860157	1.41515	-0.781902	-0.611781
PA3491	PA3491 probable ferredoxin	Biofilm (ND Only)	1.81189	1.36434	-0.678826	-0.835409	-0.461462	-0.352814	-0.433127	-0.414595
PA3509	PA3509 probable hydrolase	Biofilm (ND Only)	1.37361	1.74813	-0.875299	-0.875299	-0.414019	-0.149635	-0.454375	-0.35311
PA3513	PA3513 hypothetical protein	Biofilm (ND Only)	1.23775	1.91954	-0.71207	-0.71207	-0.509666	-0.482065	-0.404184	-0.337238
PA3526	PA3526 probable outer membrane protein precursor	Planktonic (ND Only)	-0.254148	0.0384794	-0.839896	-0.927571	-0.698939	-0.360226	1.27413	1.76817
PA3552	PA3552 ArnB	Biofilm (TOB Only)	-0.210435	-0.620608	1.3936	1.70879	-0.918452	-0.851742	-0.167289	-0.333867
PA3553	PA3553 ArnC	TOB (Biofilm and Planktonic)	-1.16197	-1.32383	0.709376	1.28744	1.03378	0.422704	-0.586617	-0.380887
PA3561	PA3561 1-phosphofructokinase	Biofilm (ND Only)	1.54512	1.4697	-1.03188	-1.04668	-0.320432	-0.404607	-0.147748	-0.0634825
PA3580	PA3580 conserved hypothetical protein	TOB (Biofilm and Planktonic)	-0.914348	-0.854484	0.185068	0.515151	1.47611	1.25455	-0.840979	-0.821068
PA3581	PA3581 glycerol uptake facilitator protein	Planktonic (TOB Only)	-0.653096	-0.674139	-0.543333	-1.29391	1.67246	1.13389	0.142745	0.215381
PA3583	PA3583 glycerol-3-phosphate regulon repressor	Biofilm (TOB Only)	-0.45967	-0.535492	1.36977	1.82128	-0.756455	-0.623361	-0.494187	-0.321881
PA3602	PA3602 conserved hypothetical protein	Biofilm (ND Only)	0.938481	2.04754	-0.790569	-0.871151	-0.572463	-0.212151	-0.380672	-0.159018
PA3606	PA3606 conserved hypothetical protein	TOB (Biofilm and Planktonic)	-0.94016	-0.960176	0.337671	0.0339124	1.61447	1.25363	-0.624997	-0.714344
PA3637	PA3637 CTP synthase	Biofilm (ND Only)	1.49439	1.58529	-0.73698	-1.01728	-0.0320452	-0.156495	-0.612399	-0.524486
PA3643	PA3643 lipid A-disaccharide synthase	Biofilm (ND Only)	0.0378446	2.4375	-0.500821	-0.500821	-0.327239	-0.332283	-0.349692	-0.464487
PA3646	PA3646 UDP-3-O-[3-hydroxylauroyl] glucosamine N-acyltransferase	Biofilm (ND Only)	1.43701	1.72726	-0.786102	-0.792363	-0.449225	-0.188664	-0.571744	-0.376168
PA3662	PA3662 hypothetical protein	Biofilm (TOB Only)	-0.441625	-0.612324	2.24659	0.470832	-0.743742	-0.751697	-0.20418	0.0361507
PA3697	PA3697 hypothetical protein	Planktonic (TOB Only)	-0.749296	-0.518279	-0.236945	-0.822905	1.67429	1.50614	-0.450168	-0.402836
PA3700	PA3700 lysyl-tRNA synthetase	Biofilm (ND Only)	1.61062	1.02921	-1.08133	-1.26253	0.242709	0.347477	-0.368564	-0.517593
PA3702	PA3702 probable two-component response regulator	Planktonic (ND Only)	0.427932	0.0468924	-0.924727	-0.973638	-0.673717	-0.649568	1.79957	0.94725
PA3703	PA3703 probable methylesterase	Planktonic (ND Only)	-0.531332	0.592135	-0.794175	-0.813613	-0.667315	-0.644499	1.68172	1.17708
PA3713	PA3713 spermidine dehydrogenase, SpdH	Planktonic (TOB Only)	-0.473338	-0.61734	-0.741546	-0.741546	0.551671	2.22861	-0.140115	-0.0663903
PA3716	PA3716 hypothetical protein	Planktonic (TOB Only)	-0.941227	-0.93496	0.220944	-0.248932	1.78831	1.17066	-0.480572	-0.574219
PA3719	PA3719 hypothetical protein	Biofilm (ND Only)	1.60028	1.31608	-0.991848	-1.00972	-0.551927	0.103141	0.141097	-0.607099
PA3726	PA3726 conserved hypothetical protein	Planktonic (TOB Only)	-0.699963	-0.732596	-0.0481295	-0.283352	1.32382	1.79469	-0.681596	-0.672874
PA3729	PA3729 conserved hypothetical protein	Biofilm (ND Only)	1.4454	1.46232	-0.79901	-1.28143	0.0193671	0.127582	-0.506053	-0.46819
PA3749	PA3749 probable major facilitator superfamily (MFS) transporter	Biofilm (ND Only)	1.03768	1.85986	-0.882191	0.0535942	-0.874641	-0.941131	-0.137798	-0.115369
PA3754	PA3754 hypothetical protein	Biofilm (TOB Only)	-1.25641	-1.2462	1.0778	1.6198	0.107669	0.0319702	-0.0825048	-0.252135
PA3773	PA3773 hypothetical protein	Planktonic (TOB Only)	-0.840123	-0.906726	1.77376	-0.516471	0.95346	0.693084	-0.565868	-0.591116
PA3777	PA3777 exodeoxyribonuclease VII large subunit	Biofilm (TOB Only)	-0.948306	-0.639424	1.3599	1.76693	-0.451518	-0.588167	-0.4013	-0.0981172
PA3779	PA3779 hypothetical protein	ND (Biofilm and Planktonic)	1.01843	0.296415	-1.0796	-1.16439	-0.881787	-0.373289	1.25228	0.931938
PA3799	PA3799 conserved hypothetical protein	Biofilm (ND Only)	1.22036	1.89693	-0.756472	-0.762808	-0.336865	-0.144809	-0.539657	-0.576683
PA3803	PA3803 probable isoprenoid biosynthetic protein GcpE	Biofilm (ND Only)	2.04203	0.69346	-0.80258	-1.14864	0.0614295	0.0270492	-0.450004	-0.42274
PA3804	PA3804 hypothetical protein	Biofilm (ND Only)	2.01946	1.08163	-0.664659	-0.664659	-0.55655	-0.606233	-0.357591	-0.251393
PA3805	PA3805 type 4 fimbrial biogenesis protein PilF	Biofilm (ND Only)	1.79714	1.37868	-0.662912	-0.672797	-0.633735	-0.645842	-0.252153	-0.308383
PA3818	PA3818 extragenic suppressor protein SuhB	Biofilm (ND Only)	1.71366	1.16096	-1.12746	-1.12746	-0.101004	0.0481458	-0.28134	-0.285495
PA3821	PA3821 secretion protein SecD	Biofilm (ND Only)	1.58755	1.49111	-0.740285	-0.951991	-0.191276	0.0386956	-0.654172	-0.579624
PA3825	PA3825 hypothetical protein	TOB (Biofilm and Planktonic)	0.0921752	-1.19054	1.679	0.735953	0.484226	0.173457	-0.990894	-0.983376
PA3835	PA3835 hypothetical protein	Biofilm (ND Only)	0.614353	2.26622	-0.631789	-0.644243	-0.371471	-0.518573	-0.429578	-0.284916
PA3856	PA3856 hypothetical protein	Planktonic (TOB Only)	-0.829567	-0.835286	0.244875	-0.55363	1.52716	1.52695	-0.532173	-0.548323
PA3869	PA3869 hypothetical protein	TOB (Biofilm and Planktonic)	-1.52961	-1.47088	1.26124	0.630624	0.567373	0.387968	-0.033333	0.186629
PA3876	PA3876 nitrite extrusion protein 2	Biofilm (ND Only)	1.32083	1.7824	-0.643567	-0.738752	-0.62256	-0.722955	-0.450229	0.0748421
PA3879	PA3879 two-component response regulator NarL	TOB (Biofilm and Planktonic)	-0.631285	-0.870929	0.0972368	0.0683942	1.88253	1.02046	-0.874763	-0.691642
PA3885	PA3885 hypothetical protein	TOB (Biofilm and Planktonic)	-0.970366	-1.03433	0.848534	0.455111	1.40252	0.899717	-0.839	-0.762187
PA3915	PA3915 molybdopterin biosynthetic protein B1	TOB (Biofilm and Planktonic)	-1.23993	-1.15897	-0.0184924	-0.086525	0.787695	1.86505	-0.102636	-0.0461909
PA3916	PA3916 molybdopterin converting factor, large subunit	Planktonic (ND Only)	-0.0687058	0.00237471	-0.869879	-0.869879	-0.747316	-0.481472	1.30965	1.72523
PA3917	PA3917 molybdopterin converting factor, small subunit	Planktonic (ND Only)	-0.518351	-0.669571	-0.610851	-0.390557	-0.528085	-0.511599	1.65599	1.57303
PA3919	PA3919 conserved hypothetical protein	TOB (Biofilm and Planktonic)	-1.21217	-1.29305	0.668204	0.157621	1.53564	0.864118	-0.252996	-0.46737
PA3928	PA3928 hypothetical protein	Planktonic (TOB Only)	-0.37267	-0.572845	-0.623005	-0.719386	1.90778	1.26312	-0.476117	-0.406872
PA3936	PA3936 probable permease of ABC taurine transporter	Planktonic (ND Only)	0.331986	0.480132	-0.944167	-1.14886	-0.598613	-0.766732	1.30938	1.33687
PA3953	PA3953 conserved hypothetical protein	Biofilm (ND Only)	1.12194	1.99897	-0.767805	-0.572376	-0.439446	-0.577957	-0.451547	-0.311773
PA3964	PA3964 hypothetical protein	TOB (Biofilm and Planktonic)	-1.16957	-0.951694	0.679911	-0.157872	1.62939	1.00918	-0.633095	-0.406248
PA3966	PA3966 hypothetical protein	Biofilm (TOB Only)	-1.16926	-1.26749	1.63321	0.974131	0.372036	-0.513845	0.0453823	-0.0741686
PA3967	PA3967 hypothetical protein	Biofilm (ND Only)	0.972615	2.09256	-0.280159	-0.639844	-0.599681	-0.656165	-0.415421	-0.473903
PA3982	PA3982 conserved hypothetical protein	Biofilm (ND Only)	1.43972	1.49665	-0.906601	-1.12099	-0.196348	0.279469	-0.488937	-0.502962
PA3988	PA3988 hypothetical protein	Biofilm (ND Only)	1.93597	1.00896	-0.845978	-1.00283	0.0721307	-0.208774	-0.437292	-0.522178
PA3990	PA3990 conserved hypothetical protein	Planktonic (TOB Only)	-0.763278	-0.801965	-0.408131	-0.899195	1.9956	0.867878	-0.17359	0.182682
PA4003	PA4003 penicillin-binding protein 2	Biofilm (ND Only)	1.70996	1.38812	-0.847758	-0.952907	-0.437596	-0.0858334	-0.496637	-0.277351
PA4032	PA4032 probable two-component response regulator	TOB (Biofilm and Planktonic)	-0.831791	-0.838577	0.44823	-0.577181	0.871642	1.94716	-0.51295	-0.506529
PA4039	PA4039 hypothetical protein	TOB (Biofilm and Planktonic)	-1.11469	-1.13476	0.638878	0.642519	1.26516	1.06088	-0.696733	-0.661263
PA4042	PA4042 exodeoxyribonuclease VII small subunit	TOB (Biofilm and Planktonic)	-0.920964	-1.02061	0.279385	0.283293	1.64916	1.12163	-0.747985	-0.643904
PA4044	PA4044 1-deoxyxylulose-5-phosphate synthase	Planktonic (TOB Only)	-0.0838473	-0.317098	-0.277885	-1.03503	1.17305	1.86734	-0.639926	-0.686595
PA4049	PA4049 hypothetical protein	Biofilm (ND Only)	0.546059	2.19645	-0.777971	-0.951198	-0.540696	-0.153508	-0.142908	-0.176231
PA4060	PA4060 hypothetical protein	Planktonic (ND Only)	-0.272481	-0.436507	-0.519542	-0.745282	-0.593266	-0.582945	1.9333	1.21672
PA4063	PA4063 hypothetical protein	Biofilm (ND Only)	1.38531	0.628071	-1.27105	-1.3807	0.868979	0.43398	-0.321581	-0.343014
PA4071	PA4071 hypothetical protein	Biofilm (ND Only)	1.30527	1.88698	-0.548565	-0.619619	-0.563448	-0.603364	-0.458456	-0.398793
PA4072	PA4072 probable amino acid permease	Biofilm (ND Only)	1.15163	1.87287	-0.109896	-0.131163	-0.91299	-0.92557	-0.482713	-0.462163
PA4105	PA4105 hypothetical protein	Planktonic (ND Only)	1.41815	-0.166897	-0.948924	-0.995481	-0.762762	-0.603824	0.999144	1.0606
PA4109	PA4109 transcriptional regulator AmpR	Biofilm (ND Only)	1.10177	1.67671	-1.11145	-1.11145	-0.605875	-0.266488	0.0694112	0.247359
PA4127	PA4127 2-oxo-hept-3-ene-1,7-dioate hydratase	Planktonic (TOB Only)	-0.588176	-0.61709	0.0283851	-0.90392	1.96723	1.05826	-0.570463	-0.374225
PA4156	PA4156 probable TonB-dependent receptor	ND (Biofilm and Planktonic)	0.974417	1.45188	-1.25263	-1.31883	-0.2365	-0.464451	0.375393	0.470731
PA4174	PA4174 probable transcriptional regulator	TOB (Biofilm and Planktonic)	-0.96439	-0.763085	0.820535	-0.203969	0.488612	1.92106	-0.659047	-0.639713
PA4177	PA4177 hypothetical protein	TOB (Biofilm and Planktonic)	-0.906816	-0.927922	1.2296	-0.0953704	1.3179	0.928504	-0.802746	-0.743146
PA4183	PA4183 hypothetical protein	Biofilm (TOB Only)	-0.991351	-0.987568	1.05029	1.65172	0.117213	0.518591	-0.631065	-0.727828
PA4184	PA4184 probable transcriptional regulator	Biofilm (TOB Only)	-0.388999	-0.803355	1.40749	1.73401	-0.601409	-0.835502	-0.366882	-0.145351
PA4219	PA4219 hypothetical protein	Biofilm (ND Only)	1.64934	1.22689	-0.721663	0.593074	-0.721663	-0.582654	-0.721663	-0.721663
PA4222	PA4222 probable ATP-binding component of ABC transporter	Biofilm (ND Only)	2.13969	0.880761	-0.41201	-0.758633	-0.621931	-0.482887	-0.412743	-0.332244
PA4230	PA4230 salicylate biosynthesis protein PchB	Biofilm (ND Only)	0.484072	2.27246	-0.606237	-0.657793	-0.606637	-0.609683	-0.246576	-0.0296031
PA4248	PA4248 50S ribosomal protein L6	Biofilm (ND Only)	0.995097	2.08538	-0.593692	-0.593692	-0.385239	-0.320465	-0.593692	-0.593692
PA4273	PA4273 50S ribosomal protein L1	Biofilm (ND Only)	1.98374	1.09976	-0.782217	-0.821418	-0.41724	-0.248399	-0.380143	-0.434078
PA4307	PA4307 chemotactic transducer PctC	Planktonic (ND Only)	0.0130561	-0.0467425	-0.887498	-0.856588	-0.750899	-0.484574	1.24417	1.76908
PA4318	PA4318 hypothetical protein	Planktonic (TOB Only)	-0.776675	-0.540754	-0.757268	-0.427508	1.90322	1.23187	-0.252611	-0.380267
PA4326	PA4326 hypothetical protein	Biofilm (ND Only)	1.80077	1.42082	-0.57035	-0.569339	-0.465666	-0.56175	-0.509114	-0.545375
PA4332	PA4332 hypothetical protein	Planktonic (ND Only)	-0.551081	-0.535222	-0.424801	-0.420405	-0.576133	-0.639746	1.15036	1.99703
PA4347	PA4347 hypothetical protein	Planktonic (ND Only)	-0.578324	-0.549238	-0.74222	-0.87137	-0.0909549	-0.273751	1.82433	1.28153
PA4352	PA4352 conserved hypothetical protein	Planktonic (TOB Only)	-0.598454	-0.616241	-0.181482	-0.624116	1.23301	1.91782	-0.531689	-0.598846
PA4364	PA4364 hypothetical protein	TOB (Biofilm and Planktonic)	-1.1823	-1.18485	0.478372	1.27335	0.791104	1.00974	-0.593183	-0.592233
PA4366	PA4366 superoxide dismutase	Planktonic (TOB Only)	-0.280665	-0.447383	-0.62754	-0.848076	1.9897	1.1148	-0.468019	-0.432812
PA4367	PA4367 BifA	Biofilm (TOB Only)	-0.77733	-0.735471	2.09567	0.657802	-0.691121	-0.723775	0.16964	0.00458412
PA4380	PA4380 probable two-component sensor	Biofilm (ND Only)	1.48979	1.55746	-0.857261	-0.857261	-0.65044	-0.636318	0.144391	-0.190358
PA4431	PA4431 probable iron-sulfur protein	Planktonic (TOB Only)	0.108947	0.460495	-0.942026	-1.15712	1.37626	1.37865	-0.659602	-0.565596
PA4435	PA4435 probable acyl-CoA dehydrogenase	Planktonic (ND Only)	-0.610689	-0.480392	-0.704031	-0.704031	-0.531526	-0.161804	1.60902	1.58346
PA4440	PA4440 hypothetical protein	Biofilm (TOB Only)	-0.626616	-0.685532	0.445547	2.30616	-0.488174	-0.547789	-0.183245	-0.22035
PA4443	PA4443 ATP sulfurylase small subunit	Biofilm (TOB Only)	-0.717327	-0.720864	1.46831	1.61175	-0.742255	-0.79129	0.0666346	-0.174956
PA4447	PA4447 histidinol-phosphate aminotransferase	TOB (Biofilm and Planktonic)	-1.10531	-1.11663	1.14904	-0.0420625	1.14576	1.11406	-0.56516	-0.579698
PA4448	PA4448 histidinol dehydrogenase	Planktonic (TOB Only)	-0.723277	-0.85205	0.45079	-0.642323	1.26427	1.68403	-0.552853	-0.628584
PA4461	PA4461 probable ATP-binding component of ABC transporter	Biofilm (ND Only)	1.43976	1.54022	-0.4842	-1.01611	0.0702749	0.0367847	-0.900038	-0.68669
PA4463	PA4463 conserved hypothetical protein	Planktonic (ND Only)	1.05059	-0.626999	-0.985102	-1.26292	-0.344761	-0.189878	1.16875	1.19031
PA4464	PA4464 nitrogen regulatory IIA protein	Planktonic (ND Only)	-0.0739265	1.40381	-1.3162	-1.23109	-0.0379425	-0.491425	0.812812	0.933962
PA4465	PA4465 conserved hypothetical protein	Biofilm (ND Only)	0.859575	1.94615	-1.01755	-1.01755	0.154759	-0.0772126	-0.50531	-0.342857
PA4471	PA4471 hypothetical protein	Biofilm (ND Only)	1.72329	1.45851	-0.530621	-0.262344	-0.816852	-0.718951	-0.474712	-0.378326
PA4472	PA4472 PmbA protein	Planktonic (ND Only)	-0.40682	-0.449848	-0.745044	-0.290191	-0.661212	-0.631167	1.80123	1.38305
PA4475	PA4475 conserved hypothetical protein	Planktonic (TOB Only)	-0.613342	-0.774648	-1.05365	-1.06518	1.43345	1.02997	0.765613	0.277775
PA4476	PA4476 hypothetical protein	Planktonic (ND Only)	0.196671	-0.0518993	-1.05441	-0.995062	-0.533714	-0.498428	1.5423	1.39454
PA4480	PA4480 rod shape-determining protein MreC	Biofilm (ND Only)	1.28131	1.41336	-1.01704	-1.41378	-0.151958	0.404189	-0.195328	-0.320759
PA4483	PA4483 Glu-tRNA(Gln) amidotransferase subunit A	Biofilm (ND Only)	1.93055	1.10442	-0.891626	-0.940189	-0.313112	-0.245679	-0.386512	-0.257854
PA4484	PA4484 Glu-tRNA(Gln) amidotransferase subunit B	Biofilm (ND Only)	1.90638	1.01775	-0.782206	-1.09009	-0.358521	0.164635	-0.4842	-0.373748
PA4512	PA4512 lipopolysaccharide biosynthetic protein LpxO1	Biofilm (ND Only)	1.38778	1.82129	-0.400576	-0.485282	-0.652963	-0.612843	-0.527135	-0.530274
PA4515	PA4515 conserved hypothetical protein	Biofilm (TOB Only)	-0.625051	-0.710033	1.76602	1.39152	-0.783879	-0.188694	-0.564187	-0.285698
PA4516	PA4516 hypothetical protein	Biofilm (TOB Only)	-0.519364	-0.521369	2.0687	1.04111	-0.44573	-0.431829	-0.598331	-0.593185
PA4522	PA4522 beta-lactamase expression regulator AmpD	Biofilm (TOB Only)	-0.0459454	-0.736284	1.205	1.87418	-0.829201	-0.727918	-0.362658	-0.377167
PA4523	PA4523 hypothetical protein	Biofilm (TOB Only)	-0.516866	-0.51154	2.12234	0.902556	-0.720584	-0.670717	-0.302689	-0.302501
PA4525	PA4525 type 4 fimbrial precursor PilA	Biofilm (ND Only)	1.08885	2.03857	-0.561742	-0.538739	-0.572383	-0.599806	-0.418279	-0.436468
PA4526	PA4526 type 4 fimbrial biogenesis protein PilB	Biofilm (ND Only)	1.05336	2.06072	-0.600284	-0.471634	-0.568597	-0.585837	-0.427772	-0.459963
PA4527	PA4527 still frameshift type 4 fimbrial biogenesis protein PilC	Biofilm (ND Only)	1.43998	1.77902	-0.636275	-0.474061	-0.644705	-0.453877	-0.515324	-0.494752
PA4528	PA4528 type 4 prepilin peptidase PilD	Biofilm (ND Only)	1.26968	1.91396	-0.606404	-0.605447	-0.563461	-0.555907	-0.409613	-0.442806
PA4538	PA4538 NADH dehydrogenase	Biofilm (TOB Only)	-0.781622	-1.10002	0.871713	1.27699	1.22816	0.0949589	-0.852935	-0.737244
PA4547	PA4547 two-component response regulator PilR	Biofilm (ND Only)	1.31756	1.87022	-0.624872	-0.611567	-0.603137	-0.595856	-0.378024	-0.374324
PA4550	PA4550 type 4 fimbrial biogenesis protein FimU	Biofilm (ND Only)	0.903924	2.00503	-0.371948	-0.778739	-0.29234	0.152236	-0.817117	-0.801046
PA4551	PA4551 type 4 fimbrial biogenesis protein PilV	Biofilm (ND Only)	1.20633	1.94566	-0.67995	-0.26075	-0.526792	-0.509795	-0.61438	-0.560329
PA4552	PA4552 type 4 fimbrial biogenesis protein PilW	Biofilm (ND Only)	1.01835	2.08056	-0.591327	-0.40056	-0.586739	-0.574495	-0.437023	-0.508761
PA4553	PA4553 type 4 fimbrial biogenesis protein PilX	Biofilm (ND Only)	0.872852	2.15754	-0.52901	-0.573173	-0.510471	-0.53999	-0.302164	-0.575584
PA4554	PA4554 type 4 fimbrial biogenesis protein PilY1	Biofilm (ND Only)	1.31979	1.8807	-0.604089	-0.596372	-0.515303	-0.490775	-0.488136	-0.505819
PA4555	PA4555 type 4 fimbrial biogenesis protein PilY2	Planktonic (ND Only)	0.697007	-0.585833	-0.954701	-0.954701	-0.313112	-0.62983	1.1511	1.59007
PA4556	PA4556 type 4 fimbrial biogenesis protein PilE	Biofilm (ND Only)	1.10482	2.01723	-0.612581	-0.644182	-0.576625	-0.57572	-0.326176	-0.386765
PA4557	PA4557 LytB protein	Biofilm (ND Only)	1.97902	0.708006	-1.01234	-1.07059	0.0455016	0.18332	-0.536141	-0.296783
PA4559	PA4559 prolipoprotein signal peptidase	Biofilm (ND Only)	1.85113	1.3353	-0.675745	-0.710218	-0.408229	-0.359857	-0.526867	-0.505507
PA4572	PA4572 peptidyl-prolyl cis-trans isomerase FklB	Planktonic (TOB Only)	-0.580016	-0.619058	-0.430208	-0.755957	1.72902	1.48108	-0.397218	-0.42765
PA4582	PA4582 conserved hypothetical protein	Biofilm (TOB Only)	-0.706808	-0.352398	1.2272	1.83191	-0.882014	-0.827957	-0.211539	-0.0783853
PA4629	PA4629 hypothetical protein	TOB (Biofilm and Planktonic)	-0.816717	-0.838972	-0.156474	-0.499193	2.14282	0.764947	-0.317254	-0.279163
PA4635	PA4635 conserved hypothetical protein	Planktonic (ND Only)	0.265939	-0.260974	-0.944853	-0.805227	-0.625311	-0.616685	1.70248	1.28463
PA4654	PA4654 probable major facilitator superfamily (MFS) transporter	Planktonic (TOB Only)	0.949316	-0.559648	-0.875415	-1.04211	1.58599	0.950359	-0.448738	-0.559755
PA4655	PA4655 ferrochelatase	Biofilm (ND Only)	1.663	1.42317	-0.810423	-1.05133	-0.536212	-0.232733	-0.255143	-0.200335
PA4659	PA4659 probable transcriptional regulator	Biofilm (TOB Only)	-0.431887	-0.50482	0.338206	2.2458	-0.840191	-0.772001	0.203912	-0.239021
PA4662	PA4662 glutamate racemase	Biofilm (ND Only)	1.54924	1.40178	-0.752187	-1.28866	-0.257216	0.1472	-0.384807	-0.415362
PA4666	PA4666 glutamyl-tRNA reductase	Biofilm (ND Only)	1.22096	1.9096	-0.74101	-0.76944	-0.557558	-0.504961	-0.267897	-0.289696
PA4668	PA4668 probable lipoprotein localization protein LolB	Biofilm (ND Only)	1.22146	1.93457	-0.688086	-0.688086	-0.533535	-0.345227	-0.516606	-0.384489
PA4688	PA4688 iron (III)-transport system permease HitB	Biofilm (TOB Only)	-0.566911	-0.720594	1.74802	1.42653	-0.61632	-0.73746	-0.30476	-0.228507
PA4689	PA4689 hypothetical protein	TOB (Biofilm and Planktonic)	-1.14852	-1.20377	1.20796	0.578597	1.14669	0.624743	-0.54878	-0.656918
PA4700	PA4700 penicillin-binding protein 1B	Biofilm (ND Only)	1.3119	1.46819	-1.16404	-1.16404	-0.591259	0.0103309	-0.1019	0.230817
PA4711	PA4711 hypothetical protein	Planktonic (TOB Only)	-0.752168	-0.700584	-0.300109	-0.7445	1.08796	1.98706	-0.29856	-0.279094
PA4734	PA4734 hypothetical protein	TOB (Biofilm and Planktonic)	-0.83961	-0.890349	0.0230909	-0.143208	1.26373	1.77994	-0.640127	-0.553467
PA4736	PA4736 hypothetical protein	Planktonic (ND Only)	-0.67572	-0.999916	-0.294065	-0.703092	-0.0607408	-0.362248	1.41388	1.6819
PA4738	PA4738 conserved hypothetical protein	Planktonic (TOB Only)	-0.756056	-0.783458	0.0457015	-0.665865	1.23782	1.84647	-0.464095	-0.460517
PA4739	PA4739 conserved hypothetical protein	Planktonic (ND Only)	-0.577206	-0.550198	-0.314709	-0.528344	-0.577157	-0.668823	1.7362	1.48024
PA4745	PA4745 N utilization substance protein A	Planktonic (TOB Only)	-0.332551	-0.338208	-0.210833	-0.723522	1.76699	1.37698	-0.818095	-0.720759
PA4760	PA4760 DnaJ protein	Biofilm (ND Only)	1.62152	1.41324	-1.031	-0.823703	-0.600482	-0.493469	0.0668739	-0.15299
PA4767	PA4767 conserved hypothetical protein	Planktonic (ND Only)	0.447185	-0.189359	-1.03324	-1.03324	-0.429019	-0.610807	1.33776	1.51071
PA4770	PA4770 L-lactate permease	Planktonic (ND Only)	-0.637144	-0.567123	0.705991	-0.849764	-0.757876	-0.66863	1.68844	1.0861
PA4771	PA4771 L-lactate dehydrogenase	Planktonic (ND Only)	-0.442432	-0.582999	-0.553615	-0.127752	-0.718195	-0.737455	1.78294	1.37951
PA4778	PA4778 probable transcriptional regulator	Planktonic (TOB Only)	-0.577334	-0.835378	-0.70059	-0.934309	1.70274	1.13941	0.542271	-0.336808
PA4833	PA4833 conserved hypothetical protein	Biofilm (TOB Only)	-0.764877	-0.792266	0.752487	2.17782	-0.299897	-0.410571	-0.335372	-0.327327
PA4842	PA4842 hypothetical protein	Biofilm (TOB Only)	-0.554971	-0.670323	1.25045	1.86559	-0.710048	-0.750985	-0.352981	-0.0767295
PA4857	PA4857 hypothetical protein	Planktonic (ND Only)	-0.552773	0.828361	-1.05075	0.782792	-1.0379	-0.990725	0.701916	1.31908
PA4859	PA4859 probable permease of ABC transporter	Biofilm (ND Only)	1.61011	1.35178	-0.944895	-1.10988	-0.432387	-0.499523	0.109312	-0.0845156
PA4866	PA4866 conserved hypothetical protein	TOB (Biofilm and Planktonic)	-0.790563	-0.963307	1.71473	0.358545	0.754529	0.616017	-0.871603	-0.818352
PA4869	PA4869 hypothetical protein	ND (Biofilm and Planktonic)	1.07259	0.79198	-1.50434	-1.5479	0.110826	0.0351078	0.461036	0.5807
PA4878	PA4878 probable transcriptional regulator	TOB (Biofilm and Planktonic)	-0.886184	-0.984642	0.146286	-0.13273	1.82221	1.13078	-0.489754	-0.60596
PA4896	PA4896 probable sigma-70 factor, ECF subfamily	Biofilm (ND Only)	0.720463	2.18589	-0.639183	-0.893864	-0.432435	-0.228074	-0.323123	-0.389674
PA4904	PA4904 vanillate O-demethylase oxygenase subunit	Biofilm (ND Only)	1.66927	1.43584	-0.726341	-0.793898	-0.685116	-0.659016	-0.295552	0.0548085
PA4919	PA4919 nicotinate phosphoribosyltransferase	Biofilm (TOB Only)	-0.791508	-0.796154	1.40885	1.72342	-0.290245	-0.0790005	-0.546413	-0.628947
PA4931	PA4931 replicative DNA helicase	Biofilm (ND Only)	1.38632	1.80096	-0.679226	-0.756424	-0.571661	-0.384198	-0.468901	-0.326873
PA4967	PA4967 topoisomerase IV subunit B	Biofilm (ND Only)	1.4693	1.52706	-0.764399	-1.01436	-0.322241	0.285018	-0.674802	-0.50557
PA4970	PA4970 conserved hypothetical protein	Planktonic (ND Only)	0.010404	-0.603629	-0.792729	-0.90972	-0.713918	-0.0415034	1.44332	1.60777
PA5018	PA5018 peptide methionine sulfoxide reductase	Planktonic (ND Only)	0.762839	-0.982777	-0.186223	-0.194482	-0.949345	-0.987465	0.891864	1.64559
PA5039	PA5039 shikimate kinase	Biofilm (ND Only)	1.6671	1.56624	-0.547112	-0.667798	-0.526966	-0.543181	-0.47037	-0.477912
PA5040	PA5040 Type 4 fimbrial biogenesis outer membrane protein PilQ precursor	Biofilm (ND Only)	1.19741	1.95913	-0.648168	-0.627206	-0.583435	-0.51828	-0.419362	-0.360081
PA5041	PA5041 type 4 fimbrial biogenesis protein PilP	Biofilm (ND Only)	1.65479	1.56835	-0.610762	-0.619782	-0.616132	-0.605028	-0.357969	-0.41347
PA5042	PA5042 type 4 fimbrial biogenesis protein PilO	Biofilm (ND Only)	1.34694	1.84077	-0.633032	-0.648999	-0.604154	-0.604837	-0.378984	-0.317705
PA5043	PA5043 type 4 fimbrial biogenesis protein PilN	Biofilm (ND Only)	1.51088	1.66264	-0.745748	-0.791014	-0.519073	-0.609648	-0.274874	-0.233162
PA5044	PA5044 type 4 fimbrial biogenesis protein PilM	Biofilm (ND Only)	1.22481	1.89427	-0.706429	-0.742407	-0.597385	-0.64118	-0.205172	-0.226503
PA5059	PA5059 probable transcriptional regulator	ND (Biofilm and Planktonic)	0.294172	0.0782011	-1.3198	-1.3264	-0.682714	1.05126	0.853041	1.05224
PA5068	PA5068 translocation protein TatA	Planktonic (ND Only)	-0.366737	-0.243585	-0.79526	-0.578767	-0.739977	-0.461596	1.63216	1.55376
PA5072	PA5072 probable chemotaxis transducer	TOB (Biofilm and Planktonic)	-0.976697	-1.02166	0.798378	0.193963	1.31732	1.20229	-0.778174	-0.735421
PA5094	PA5094 probable ATP-binding component of ABC transporter	Planktonic (TOB Only)	-0.558479	-0.584076	-0.237262	-0.768015	1.89251	1.26724	-0.531532	-0.480393
PA5104	PA5104 conserved hypothetical protein	ND (Biofilm and Planktonic)	-0.123393	1.98158	-1.01832	-1.35119	0.208575	-0.167128	0.152519	0.317368
PA5105	PA5105 histidine utilization repressor HutC	Planktonic (TOB Only)	-0.463083	-0.602538	-0.676605	-0.730896	1.66875	1.54094	-0.366503	-0.370066
PA5121	PA5121 hypothetical protein	Planktonic (TOB Only)	-0.420505	-0.778544	-0.695151	-0.857063	1.39916	1.72117	-0.110061	-0.259002
PA5144	PA5144 hypothetical protein	Biofilm (TOB Only)	-1.01261	-0.999734	0.966941	1.93232	-0.477411	-0.190858	-0.204328	-0.0143208
PA5150	PA5150 probable short-chain dehydrogenase	Biofilm (TOB Only)	-0.564815	-0.557788	2.08592	1.00452	-0.603325	-0.583794	-0.382197	-0.398528
PA5151	PA5151 hypothetical protein	TOB (Biofilm and Planktonic)	-0.930409	-0.97464	1.29791	-0.280448	1.48985	0.647266	-0.593963	-0.655573
PA5164	PA5164 dTDP-4-dehydrorhamnose 3,5-epimerase	Biofilm (ND Only)	0.594189	2.27486	-0.580532	-0.699046	-0.477864	-0.307978	-0.393164	-0.410466
PA5165	PA5165 probable two-component sensor	TOB (Biofilm and Planktonic)	-0.943296	-1.20799	0.931967	0.771504	1.04591	0.947564	-0.752467	-0.793198
PA5174	PA5174 probable beta-ketoacyl synthase	Biofilm (ND Only)	1.55528	1.64331	-0.664566	-0.727376	-0.624214	-0.232706	-0.387919	-0.561812
PA5191	PA5191 hypothetical protein	Biofilm (TOB Only)	-0.817708	-0.922084	0.655955	2.11462	-0.0342092	-0.737314	-0.150014	-0.109242
PA5200	PA5200 two-component response regulator OmpR	Biofilm (ND Only)	1.26347	1.33698	-1.25459	-1.40423	0.20504	-0.108978	0.0696559	-0.107345
PA5202	PA5202 hypothetical protein	Biofilm (ND Only)	1.70879	1.40346	-0.763597	-0.958948	-0.336727	-0.0730361	-0.556424	-0.423513
PA5206	PA5206 acetylornithine deacetylase	TOB (Biofilm and Planktonic)	-0.965634	-1.01556	1.64255	0.0449657	1.13381	0.456936	-0.666716	-0.630353
PA5207	PA5207 probable phosphate transporter	TOB (Biofilm and Planktonic)	-1.11459	-1.11083	1.20058	0.505892	0.651842	1.21878	-0.639904	-0.711775
PA5221	PA5221 probable FAD-dependent monooxygenase	Biofilm (ND Only)	2.06538	0.983131	-0.726105	-0.743144	-0.244157	-0.491739	-0.546439	-0.296924
PA5239	PA5239 transcription termination factor Rho	Planktonic (ND Only)	-0.346158	-0.027208	-0.756261	-0.756261	-0.659813	-0.590885	1.69477	1.44181
PA5242	PA5242 polyphosphate kinase	Biofilm (ND Only)	1.47292	1.40673	-1.09996	-1.09996	0.251448	-0.130062	-0.27651	-0.524598
PA5264	PA5264 hypothetical protein	Biofilm (ND Only)	1.74171	1.10504	-0.467811	-0.991779	-0.861741	-0.852299	0.062354	0.264533
PA5276	PA5276 Lipopeptide LppL precursor	Biofilm (ND Only)	1.34596	1.8558	-0.560546	-0.686881	-0.487739	-0.523243	-0.442179	-0.501176
PA5277	PA5277 diaminopimelate decarboxylase	Biofilm (ND Only)	1.70085	1.41607	-0.801419	-0.829005	-0.202998	-0.0891152	-0.526934	-0.667457
PA5281	PA5281 probable hydrolase	Biofilm (TOB Only)	-0.26983	-0.43082	2.26841	0.598666	-0.53451	-0.643693	-0.650933	-0.337287
PA5286	PA5286 conserved hypothetical protein	Planktonic (TOB Only)	-1.02985	-1.07151	0.548404	-0.496429	1.60157	1.18598	-0.374794	-0.36336
PA5289	PA5289 hypothetical protein	Planktonic (TOB Only)	-0.938838	-1.07116	1.00678	-0.72647	1.12238	1.36987	-0.343901	-0.41866
PA5300	PA5300 cytochrome c5	Planktonic (TOB Only)	-0.89986	-0.746053	-0.454874	-0.288217	0.848674	2.11149	-0.254565	-0.316596
PA5312	PA5312 probable aldehyde dehydrogenase	TOB (Biofilm and Planktonic)	-0.868791	-0.90407	0.212103	-0.121954	1.36763	1.62445	-0.626996	-0.68237
PA5313	PA5313 probable pyridoxal-dependent aminotransferase	TOB (Biofilm and Planktonic)	-1.14024	-1.194	1.58834	0.113399	0.562876	0.99167	-0.379798	-0.542251
PA5324	PA5324 probable transcriptional regulator	Planktonic (TOB Only)	-0.827013	-0.886457	0.190923	-0.564952	1.72954	1.31374	-0.495628	-0.460156
PA5325	PA5325 hypothetical protein	TOB (Biofilm and Planktonic)	-1.06162	-1.19178	0.721726	-0.0868784	1.53955	1.04309	-0.457809	-0.506276
PA5330	PA5330 hypothetical protein	Biofilm (ND Only)	0.958876	2.08084	-0.689978	-0.818259	-0.370133	-0.36908	-0.301258	-0.491005
PA5350	PA5350 Rubredoxin 2	Planktonic (ND Only)	-0.844213	-0.905816	-0.268509	0.752059	-0.700433	-0.769292	1.40865	1.32755
PA5351	PA5351 Rubredoxin 1	Biofilm (TOB Only)	-0.911193	-1.04254	1.0771	1.76424	-0.866216	-0.193735	0.147196	0.0251434
PA5358	PA5358 4-hydroxybenzoate-octaprenyl transferase	Planktonic (TOB Only)	-0.825923	-0.847209	0.98309	-0.758707	1.25151	1.35061	-0.611548	-0.541823
PA5396	PA5396 hypothetical protein	Biofilm (TOB Only)	-0.857471	-0.177242	0.872773	1.50512	-1.10261	-1.22585	0.527062	0.458216
PA5406	PA5406 hypothetical protein	Biofilm (TOB Only)	-1.08145	-1.18139	1.01034	1.78349	0.0824961	0.0518604	-0.298437	-0.36691
PA5410	PA5410 GbcA	Planktonic (TOB Only)	-0.574678	-0.777741	-0.477163	-0.769664	1.95002	1.14733	-0.219174	-0.278933
PA5412	PA5412 hypothetical protein	Biofilm (TOB Only)	-0.892967	-0.913181	1.7103	1.3551	-0.643991	-0.40346	-0.0453464	-0.166461
PA5413	PA5413 low specificity l-threonine aldolase	Biofilm (ND Only)	1.60636	1.45059	-0.63774	-1.06901	-0.52875	-0.610848	0.108027	-0.31863
PA5438	PA5438 probable transcriptional regulator	Planktonic (TOB Only)	-0.590003	-0.668736	-0.322069	-0.352905	1.87184	1.30321	-0.577086	-0.664255
PA5456	PA5456 hypothetical protein	TOB (Biofilm and Planktonic)	-1.18219	-1.22546	0.566507	0.800581	0.991828	1.21396	-0.547061	-0.618164
PA5462	PA5462 hypothetical protein	Biofilm (ND Only)	0.751965	2.15219	-0.715849	-0.793506	-0.529963	-0.582909	-0.132952	-0.148981
PA5467	PA5467 hypothetical protein	Biofilm (TOB Only)	-0.428114	-0.694033	2.0925	0.856138	-0.752206	-0.782672	-0.109822	-0.181793
PA5472	PA5472 hypothetical protein	Planktonic (TOB Only)	-0.596123	-0.81401	0.0271009	-0.927146	1.76627	1.30759	-0.364305	-0.39937
PA5490	PA5490 cytochrome c4 precursor	Planktonic (TOB Only)	-0.499418	-0.637971	-0.171748	-0.66726	1.72446	1.46811	-0.598882	-0.617296
PA5503	PA5503 probable ATP-binding component of ABC transporter	TOB (Biofilm and Planktonic)	-0.778289	-0.819633	-0.0257642	-0.568444	1.41761	1.71583	-0.439259	-0.502047
PA5521	PA5521 probable short-chain dehydrogenase	Planktonic (TOB Only)	-0.830325	-0.943461	-0.491703	-0.257063	1.95324	1.07957	-0.284961	-0.225298
PA5523	PA5523 probable aminotransferase	TOB (Biofilm and Planktonic)	-1.12996	-1.17954	1.25498	0.355716	0.837713	1.08559	-0.598266	-0.626232
PA5532	PA5532 hypothetical protein	Biofilm (ND Only)	1.3992	1.80848	-0.575036	-0.659777	-0.590265	-0.575731	-0.391953	-0.414919
PA5540	PA5540 hypothetical protein	Biofilm (TOB Only)	-1.16305	-1.25912	0.98445	1.32641	1.02377	-0.238669	-0.362837	-0.310947
PA5542	PA5542 hypothetical protein	Planktonic (TOB Only)	-0.848156	-0.887769	0.248018	-0.652359	0.888544	1.98612	-0.339272	-0.395126
PA5548	PA5548 probable major facilitator superfamily (MFS) transporter	TOB (Biofilm and Planktonic)	1.11017	-1.4216	0.479901	-0.492483	1.21057	0.711995	-0.690583	-0.907968
