# Supplementary material for: Fitness Landscape of Antibiotic Tolerance in Pseudomonas aeruginosa Biofilms
Source: PubMed Central journal article supplement (PMC3197603; doi:10.1371/journal.ppat.1002298), 2011-10-20
Supplement: ppat.1002298.s016.pdf [file ppat.1002298.s016.pdf]

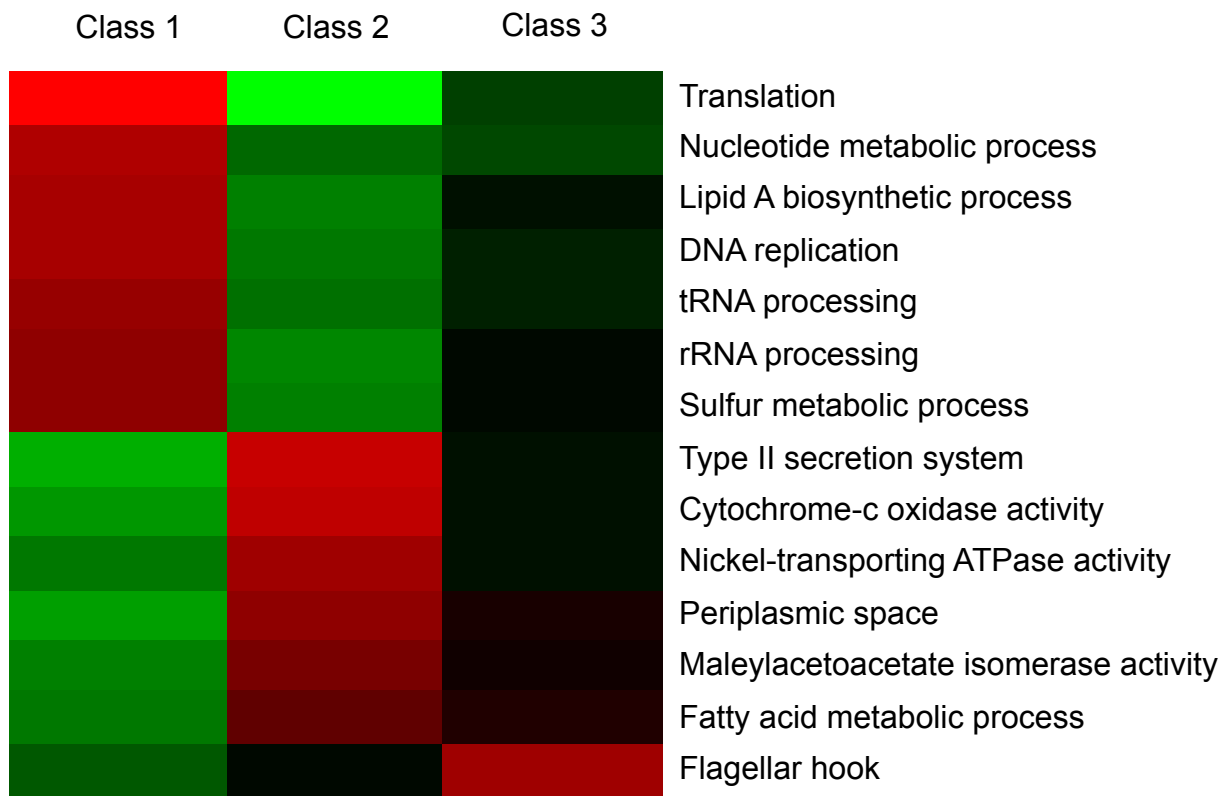

Under-representation  Over-representation  
 $-\text{Log}_{10}(\text{p-value}) = 6$   $-\text{Log}_{10}(\text{p-value}) = 6$
