# Supplementary material for: Fitness Landscape of Antibiotic Tolerance in Pseudomonas aeruginosa Biofilms
Source: PubMed Central journal article supplement (PMC3197603; doi:10.1371/journal.ppat.1002298), 2011-10-20
Supplement: ppat.1002298.s018.pdf [file ppat.1002298.s018.pdf]

Anti-correlated with  
PA2771 Expression

Correlated with  
PA2771 Expression

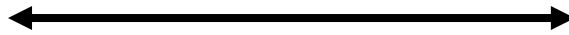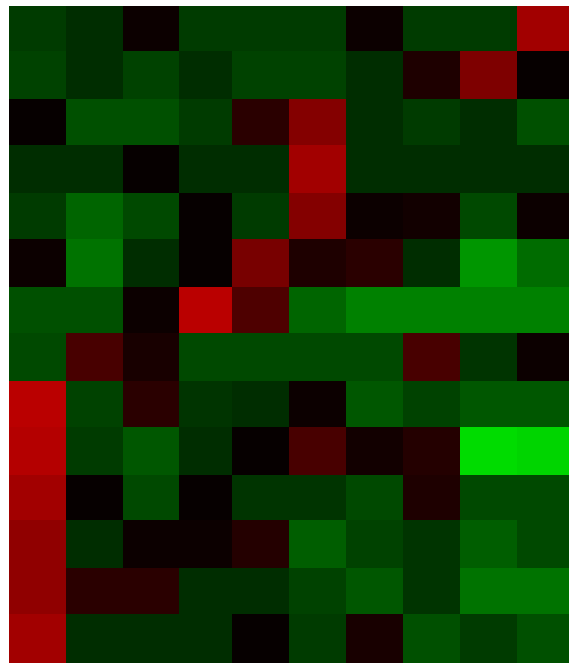

response to drug  
nickel ion transport  
structural molecule activity  
negative regulation of DNA replication  
periplasmic space  
generation of precursor metabolites and energy  
structural constituent of ribosome  
transcription factor binding  
GTP binding  
amino acid metabolic process  
lipid biosynthetic process  
nucleotide metabolic process  
RNA metabolic process  
binary fission

Under-representation  
 $-\text{Log}_{10}(\text{p-value}) = 6$

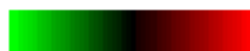

Over-representation  
 $-\text{Log}_{10}(\text{p-value}) = 6$
