# Supplementary material for: Fitness Landscape of Antibiotic Tolerance in Pseudomonas aeruginosa Biofilms
Source: PubMed Central journal article supplement (PMC3197603; doi:10.1371/journal.ppat.1002298), 2011-10-20

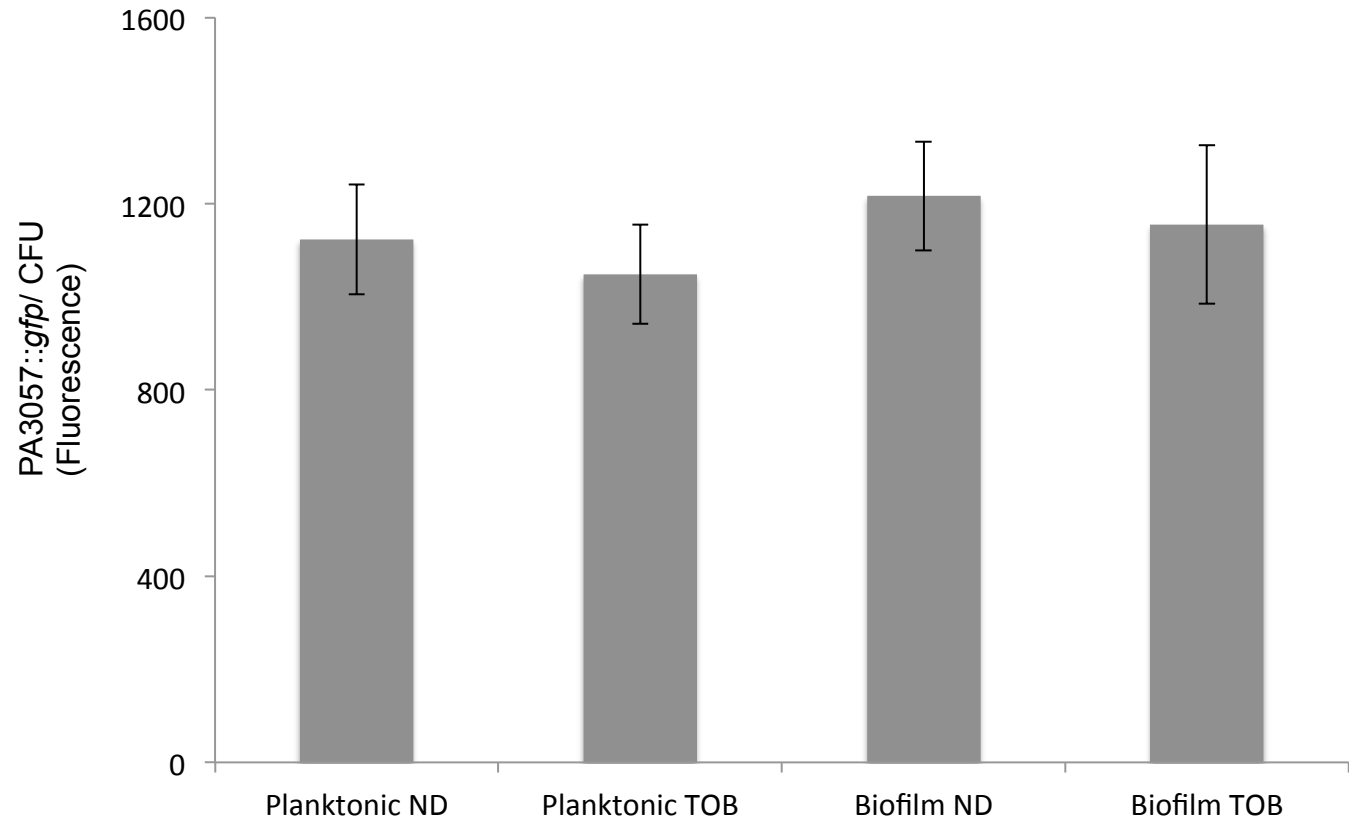

Supplement: ppat.1002298.s020.pdf [file ppat.1002298.s020.pdf]
