# Supplementary material for: Fitness Landscape of Antibiotic Tolerance in Pseudomonas aeruginosa Biofilms
Source: PLoS Pathog. 2011 Oct 20;7(10):e1002298. doi: 10.1371/journal.ppat.1002298 (PMC3197603; doi:10.1371/journal.ppat.1002298)
Supplement: Table S1 — Strain table. List of all strains used in this study. (XLS) [file ppat.1002298.s022.xls]

## Sheet: Table S1 Strains
P. aeruginosa Strains
Strain ID	Description	Source
SAH001	MPAO1	Cowles et al., 2010, Molecular Microbiology
SAH018	UW-34657; PA1329::phoA	University of Washington Collection (Jacobs et al, 2003, PNAS)
SAH019	UW-18892; PA2722::lacZ	University of Washington Collection (Jacobs et al, 2003, PNAS)
SAH020	UW-47664; PA0748::phoA	University of Washington Collection (Jacobs et al, 2003, PNAS)
SAH021	UW-16116; PA2128::lacZ	University of Washington Collection (Jacobs et al, 2003, PNAS)
SAH027	UW-32551; PA2646::phoA	University of Washington Collection (Jacobs et al, 2003, PNAS)
SAH029	UW-16928; PA1430::lacZ	University of Washington Collection (Jacobs et al, 2003, PNAS)
SAH031	UW-17770; PA1603::lacZ	University of Washington Collection (Jacobs et al, 2003, PNAS)
SAH032	UW-7024; PA2771::lacz	University of Washington Collection (Jacobs et al, 2003, PNAS)
SAH034	UW-2053; PA3580::lacZ	University of Washington Collection (Jacobs et al, 2003, PNAS)
SAH040	UW-51281; PA2672::pho	University of Washington Collection (Jacobs et al, 2003, PNAS)
SAH041	UW-32454; PA3476::phoA	University of Washington Collection (Jacobs et al, 2003, PNAS)
SAH050	UW-10396; PA1848::lacZ	University of Washington Collection (Jacobs et al, 2003, PNAS)
SAH065	UW-10550; PA0614::lacZ	University of Washington Collection (Jacobs et al, 2003, PNAS)
SAH076	UW-1557;PA3725::lacZ	University of Washington Collection (Jacobs et al, 2003, PNAS)
SAH077	UW-7110;PA0570::lacZ	University of Washington Collection (Jacobs et al, 2003, PNAS)
SAH078	UW-7986;PA0224::phoA	University of Washington Collection (Jacobs et al, 2003, PNAS)
SAH079	UW-15184;PA1675::lacZ	University of Washington Collection (Jacobs et al, 2003, PNAS)
SAH080	UW-19146;PA0336::lacZ	University of Washington Collection (Jacobs et al, 2003, PNAS)
SAH081	UW-33832;PA4736::phoA	University of Washington Collection (Jacobs et al, 2003, PNAS)
SAH082	UW-46479;PA1012::phoA	University of Washington Collection (Jacobs et al, 2003, PNAS)
SAH083	UW-48856;PA3590::phoA	University of Washington Collection (Jacobs et al, 2003, PNAS)
SAH084	UW-50363;PA0311::phoA	University of Washington Collection (Jacobs et al, 2003, PNAS)
SAH085	UW-50722;PA3208::phoA	University of Washington Collection (Jacobs et al, 2003, PNAS)
SAH087	MPAO1	This Study (Transposon sequence and its flanking region in UW-18931 (PA4854::lacZ) was replaced with original MPAO1 DNA)
SAH089	MPAO1	This Study
SAH104	UW-17841; PA1669::lacZ	University of Washington Collection (Jacobs et al, 2003, PNAS)
SAH105	UW-13686; PA1947::lacZ	University of Washington Collection (Jacobs et al, 2003, PNAS)
SAH106	UW-19414; PA3344::lacZ	University of Washington Collection (Jacobs et al, 2003, PNAS)
SAH108	UW-14479; PA3726::lacZ	University of Washington Collection (Jacobs et al, 2003, PNAS)
SAH110	UW-14686; PA4516::lacZ	University of Washington Collection (Jacobs et al, 2003, PNAS)
SAH111	UW-6622; PA5150::lacZ	University of Washington Collection (Jacobs et al, 2003, PNAS)
SAH112	UW-36168; PA1732::phoA	University of Washington Collection (Jacobs et al, 2003, PNAS)
SAH113	UW-35689; PA2637::phoA	University of Washington Collection (Jacobs et al, 2003, PNAS)
SAH114	UW-47461; PA2653::phoA	University of Washington Collection (Jacobs et al, 2003, PNAS)
SAH116	UW-37995; PA3048::phoA	University of Washington Collection (Jacobs et al, 2003, PNAS)
SAH117	UW-49297; PA3583::phoA	University of Washington Collection (Jacobs et al, 2003, PNAS)
SAH118	UW-39134; PA4866::phoA	University of Washington Collection (Jacobs et al, 2003, PNAS)
SAH119	UW-2821; PA1813::lacZ	University of Washington Collection (Jacobs et al, 2003, PNAS)
SAH120	UW-9978; PA2380::lacZ	University of Washington Collection (Jacobs et al, 2003, PNAS)
SAH121	UW-12372; PA2493::lacZ	University of Washington Collection (Jacobs et al, 2003, PNAS)
SAH123	UW-6680; PA3057::lacZ	University of Washington Collection (Jacobs et al, 2003, PNAS)
SAH124	UW-4834; PA3844::lacZ	University of Washington Collection (Jacobs et al, 2003, PNAS)
SAH125	UW-5202; PA4833::lacZ	University of Washington Collection (Jacobs et al, 2003, PNAS)
SAH126	UW-46908; PA0287::phoA	University of Washington Collection (Jacobs et al, 2003, PNAS)
SAH127	UW-50860; PA1723::phoA	University of Washington Collection (Jacobs et al, 2003, PNAS)
SAH128	UW-32335; PA3222::phoA	University of Washington Collection (Jacobs et al, 2003, PNAS)
SAH129	UW-40314; PA3966::phoA	University of Washington Collection (Jacobs et al, 2003, PNAS)
SAH130	UW-31313; PA5207::phoA	University of Washington Collection (Jacobs et al, 2003, PNAS)
SAH131	UW-32972; PA5361::phoA	University of Washington Collection (Jacobs et al, 2003, PNAS)
SAH132	UW-32414; PA5451::phoA	University of Washington Collection (Jacobs et al, 2003, PNAS)
SAH137	SAH018 Tn7-yfp-gent	This Study
SAH201	SAH020 Tn7-yfp-gent	This Study
SAH202	SAH021 Tn7-yfp-gent	This Study
SAH203	SAH027 Tn7-yfp-gent	This Study
SAH204	SAH031 Tn7-yfp-gent	This Study
SAH205	SAH032 Tn7-yfp-gent	This Study
SAH206	SAH040 Tn7-yfp-gent	This Study
SAH207	SAH041 Tn7-yfp-gent	This Study
SAH208	SAH050 Tn7-yfp-gent	This Study
SAH209	SAH105 Tn7-yfp-gent	This Study
SAH210	SAH111 Tn7-yfp-gent	This Study
SAH211	SAH116 Tn7-yfp-gent	This Study
SAH212	SAH120 Tn7-yfp-gent	This Study
SAH213	SAH121 Tn7-yfp-gent	This Study
SAH214	SAH123 Tn7-yfp-gent	This Study
SAH215	SAH124 Tn7-yfp-gent	This Study
SAH216	SAH125 Tn7-yfp-gent	This Study
SAH217	SAH129 Tn7-yfp-gent	This Study
SAH218	SAH130 Tn7-yfp-gent	This Study
SAH219	SAH131 Tn7-yfp-gent	This Study
SAH220	SAH132 Tn7-yfp-gent	This Study
SAH221	SAH019 Tn7-yfp-gent	This Study
SAH222	SAH029 Tn7-yfp-gent	This Study
SAH229	SAH106 Tn7-yfp-gent	This Study
SAH232	SAH117 Tn7-yfp-gent	This Study
SAH233	SAH119 Tn7-yfp-gent	This Study
SAH235	SAH127 Tn7-yfp-gent	This Study
SAH236	SAH128 Tn7-yfp-gent	This Study
SAH249	SAH029 pGJB6-rsaL::gfp	This Study
SAH250	SAH041 pGJB6-rsaL::gfp	This Study
SAH251	SAH127 pGJB6-rsaL::gfp	This Study
SAH277	SAH032 pGJB6-rsaL::gfp	This Study
SAH295	SAH029 pYL121-rhlAB::gfp	This Study
SAH297	SAH032 pYL121-rhlAB::gfp	This Study
SAH301	SAH041 pYL121-rhlAB::gfp	This Study
SAH314	UW-15118; PA0600::lacZ	University of Washington Collection (Jacobs et al, 2003, PNAS)
SAH315	UW-953; PA0961::lacZ	University of Washington Collection (Jacobs et al, 2003, PNAS)
SAH318	UW-3886; PA1946::lacZ	University of Washington Collection (Jacobs et al, 2003, PNAS)
SAH320	UW-10251; PA3751::lacZ	University of Washington Collection (Jacobs et al, 2003, PNAS)
SAH326	UW-43164; PA2751::phoA	University of Washington Collection (Jacobs et al, 2003, PNAS)
SAH327	UW-39219; PA3064::phoA	University of Washington Collection (Jacobs et al, 2003, PNAS)
SAH328	UW-31393; PA4175::phoA	University of Washington Collection (Jacobs et al, 2003, PNAS)
SAH342	SAH084 pGJB6-rsaL::gfp	This Study
SAH346	SAH084 pYL121-rhlAB::gfp	This Study
SAH347	SAH127 pYL121-rhlAB::gfp	This Study
SAH349	SAH089 Tn7-cfp-gent	This Study
SAH351	SAH089 Tn7-yfp-gent	This Study
SAH355	SAH314 Tn7-yfp-gent	This Study
SAH356	SAH315 Tn7-yfp-gent	This Study
SAH359	SAH318 Tn7-yfp-gent	This Study
SAH361	SAH320 Tn7-yfp-gent	This Study
SAH365	SAH326 Tn7-yfp-gent	This Study
SAH366	SAH327 Tn7-yfp-gent	This Study
SAH367	SAH328 Tn7-yfp-gent	This Study
SAH374	SAH034 Tn7-yfp-gent	This Study
SAH375	SAH065 Tn7-yfp-gent	This Study
SAH381	SAH104 Tn7-yfp-gent	This Study
SAH382	SAH110 Tn7-yfp-gent	This Study
SAH383	SAH112 Tn7-yfp-gent	This Study
SAH384	SAH113 Tn7-yfp-gent	This Study
SAH385	SAH114 Tn7-yfp-gent	This Study
SAH386	SAH118 Tn7-yfp-gent	This Study
SAH387	SAH126 Tn7-yfp-gent	This Study
SAH388	SAH108 Tn7-yfp-gent	This Study
SAH407	SAH020 pYL121-rhlAB::gfp	This Study
SAH408	SAH065 pYL121-rhlAB::gfp	This Study
SAH409	SAH108 pYL121-rhlAB::gfp	This Study
SAH410	SAH110 pYL121-rhlAB::gfp	This Study
SAH412	SAH116 pYL121-rhlAB::gfp	This Study
SAH413	SAH123 pYL121-rhlAB::gfp	This Study
SAH414	SAH124 pYL121-rhlAB::gfp	This Study
SAH415	SAH128 pYL121-rhlAB::gfp	This Study
SAH416	SAH129 pYL121-rhlAB::gfp	This Study
SAH417	SAH130 pYL121-rhlAB::gfp	This Study
SAH419	SAH018 pGJB6-rsaL::gfp	This Study
SAH420	SAH020 pGJB6-rsaL::gfp	This Study
SAH421	SAH065 pGJB6-rsaL::gfp	This Study
SAH422	SAH108 pGJB6-rsaL::gfp	This Study
SAH424	SAH112 pGJB6-rsaL::gfp	This Study
SAH425	SAH116 pGJB6-rsaL::gfp	This Study
SAH426	SAH123 pGJB6-rsaL::gfp	This Study
SAH427	SAH124 pGJB6-rsaL::gfp	This Study
SAH428	SAH128 pGJB6-rsaL::gfp	This Study
SAH429	SAH129 pGJB6-rsaL::gfp	This Study
SAH430	SAH130 pGJB6-rsaL::gfp	This Study
SAH434	SAH084 Tn7-cfp-gent	This Study
SAH437	SAH018 pYL121-rhlAB::gfp	This Study
SAH438	SAH112 pYL121-rhlAB::gfp	This Study
SAH439	SAH110 pGJB6-rsaL::gfp	This Study
SAH474	SAH087 pUCP20-PA0614'-gfp	This Study
SAH475	SAH466 pYL121-rhlAB::gfp	This Study
SAH476	SAH466 pGJB6-rsaL::gfp	This Study
SAH491	SAH087 pUCP20-PA3726'-gfp	This Study
SAH500	SAH087 pJN105	This Study
SAH501	SAH087 pJN105-PA0614	This Study
SAH502	MPAO1	This Study (Transposon sequence and its flanking region in UW-31715 (PA0035::phoA) was replaced with original MPAO1 DNA)
SAH515	SAH087 pUCP20-PA3057'-gfp	This Study
E. coli Strains
E. coli HB101 pRK2013
E. coli S17 λ-pir pTNS2
E. coli S17 λ-pir pBTK30-pMAR2xT7
