# Supplementary material for: Fitness Landscape of Antibiotic Tolerance in Pseudomonas aeruginosa Biofilms
Source: PLoS Pathog. 2011 Oct 20;7(10):e1002298. doi: 10.1371/journal.ppat.1002298 (PMC3197603; doi:10.1371/journal.ppat.1002298)
Supplement: Table S2 — Plasmid table. List of all plasmids used in this study. (XLS) [file ppat.1002298.s023.xls]

## Sheet: Table S2 Plasmids
Plasmid	Origin
pYL121-rhlAB::gfp	Siehnel et al., PNAS, 2010
pGJB6-rsaL::gfp	Siehnel et al., PNAS, 2010
pJN105	Newman et al., Gene, 1999
pJN105-PA0614	This Study
pUCP20-PA0614'-gfp	This Study
pUCP20-PA3726'-gfp	This Study
pUCP20-PA3057'-gfp	This Study
pUCP20	West et al., Gene, 1994
pFLP2	Choi et al., Nature Protocols, 2006
pUC18T-mini-Tn7T-Gm-eyfp	Choi et al., Nature Protocols, 2006
pUC18T-mini-Tn7T-Gm-ecfp	Choi et al., Nature Protocols, 2006
pTNS2	Choi et al., Nature Protocols, 2006
pRK2013	Choi et al., Nature Protocols, 2006
pBTK30	Goodman et al., Developmental Cell, 2004
pMAR2xT7	Liberati et al., PNAS, 2006
pBTK-MAR2xT7	This Study
